# Supplementary material for: The nasal microbiome redefines Staphylococcus aureus colonisation
Source: Research Square preprint supplement (doi:10.21203/rs.3.rs-6079410/v1), 2025-04-29
Supplement: Supplementary file 1 [file 4f2bd7d9fb94c537e9ed936c.docx]

# Supplementary Materials for Aggarwal *et al*.

##

## Supplementary Tables

| **Name** | **Sequence** |
| --- | --- |
| V1FW_SD501 | AATGATACGGCGACCACCGAGATCTACACAAGCAGCAacactctttccctacacgacgctcttccgatctNNNNAGMGTTYGATYMTGGCTCAG |
| V1FW_SD502 | AATGATACGGCGACCACCGAGATCTACACACGCGTGAacactctttccctacacgacgctcttccgatctNNNNAGMGTTYGATYMTGGCTCAG |
| V1FW_SD503 | AATGATACGGCGACCACCGAGATCTACACCGATCTACacactctttccctacacgacgctcttccgatctNNNNAGMGTTYGATYMTGGCTCAG |
| V1FW_SD504 | AATGATACGGCGACCACCGAGATCTACACTGCGTCACacactctttccctacacgacgctcttccgatctNNNNAGMGTTYGATYMTGGCTCAG |
| V1FW_SD505 | AATGATACGGCGACCACCGAGATCTACACGTCTAGTGacactctttccctacacgacgctcttccgatctNNNNAGMGTTYGATYMTGGCTCAG |
| V1FW_SD506 | AATGATACGGCGACCACCGAGATCTACACCTAGTATGacactctttccctacacgacgctcttccgatctNNNNAGMGTTYGATYMTGGCTCAG |
| V1FW_SD507 | AATGATACGGCGACCACCGAGATCTACACGATAGCGTacactctttccctacacgacgctcttccgatctNNNNAGMGTTYGATYMTGGCTCAG |
| V1FW_SD508 | AATGATACGGCGACCACCGAGATCTACACTCTACACTacactctttccctacacgacgctcttccgatctNNNNAGMGTTYGATYMTGGCTCAG |
| V2RV_SD701 | CAAGCAGAAGACGGCATACGAGATACCTAGTAgtgactggagttcagacgtgtgctcttccgatctNNNNGCTGCCTCCCGTAGGAGT |
| V2RV_SD702 | CAAGCAGAAGACGGCATACGAGATACGTACGTgtgactggagttcagacgtgtgctcttccgatctNNNNGCTGCCTCCCGTAGGAGT |
| V2RV_SD703 | CAAGCAGAAGACGGCATACGAGATATATCGCGgtgactggagttcagacgtgtgctcttccgatctNNNNGCTGCCTCCCGTAGGAGT |
| V2RV_SD704 | CAAGCAGAAGACGGCATACGAGATCACGATAGgtgactggagttcagacgtgtgctcttccgatctNNNNGCTGCCTCCCGTAGGAGT |
| V2RV_SD705 | CAAGCAGAAGACGGCATACGAGATCGTATCGCgtgactggagttcagacgtgtgctcttccgatctNNNNGCTGCCTCCCGTAGGAGT |
| V2RV_SD706 | CAAGCAGAAGACGGCATACGAGATCTGCGACTgtgactggagttcagacgtgtgctcttccgatctNNNNGCTGCCTCCCGTAGGAGT |
| V2RV_SD707 | CAAGCAGAAGACGGCATACGAGATGCTGTAACgtgactggagttcagacgtgtgctcttccgatctNNNNGCTGCCTCCCGTAGGAGT |
| V2RV_SD708 | CAAGCAGAAGACGGCATACGAGATGGACGTTAgtgactggagttcagacgtgtgctcttccgatctNNNNGCTGCCTCCCGTAGGAGT |
| V2RV_SD709 | CAAGCAGAAGACGGCATACGAGATGGTCGTAGgtgactggagttcagacgtgtgctcttccgatctNNNNGCTGCCTCCCGTAGGAGT |
| V2RV_SD710 | CAAGCAGAAGACGGCATACGAGATTAAGTCTCgtgactggagttcagacgtgtgctcttccgatctNNNNGCTGCCTCCCGTAGGAGT |
| V2RV_SD711 | CAAGCAGAAGACGGCATACGAGATTACACAGTgtgactggagttcagacgtgtgctcttccgatctNNNNGCTGCCTCCCGTAGGAGT |
| V2RV_SD712 | CAAGCAGAAGACGGCATACGAGATTTGACGCAgtgactggagttcagacgtgtgctcttccgatctNNNNGCTGCCTCCCGTAGGAGT |

**Table S1: Full length Illumina tagged primers used in study**

| **Original taxa** | **BLAST assigned taxa** | **OTU** |
| --- | --- | --- |
| *Solanum melongena (eggplant)* | *Moraxella osloensis* | 7278 | |
| *Ambystoma mexicanum (axolotl)* | *Acinetobacter lwoffii* | 16873 | |
| *gamma proteobacterium enrichment culture clone JF9-3* | *Pseudomonas stutzeri* | 7869 | |
| *Ceuthophilus sp.* | *Pseudomonas sp.* | 17786 | |
| *bacterium enrichment culture clone Guo10* | *Acinetobacter sp.* | 16545 | |
| *uncultured gamma proteobacterium* | *Acinetobacter johnsonii* | 16234 | |
| *uncultured gamma proteobacterium* | *Acinetobacter sp.* | 6386 | |
| *Coregonus lavaretus (common whitefish)* | *Cutibacterium acnes* | 1449 | |
| *uncultured gamma proteobacterium* | *Pseudomonas sp.* | 15694 | |
| *uncultured alpha proteobacterium* | *Agrobacterium sp.* | 2447 | |
| *Athetis lepigone* | *Pseudomonas putida* | 15973 | |
| *uncultured gamma proteobacterium* | *Pantoea agglomerans* | 19430 | |
| *bacterium enrichment culture clone Guo10* | *Acinetobacter johnsonii* | 16549 | |
| *Triticum aestivum (bread wheat)* | *Pantoea agglomerans* | 1713 | |
| *Cyanobacteria/Melainabacteria group bacterium S15B-MN24 CBMW_12* | *bacterium* | 2448 | |
| *Triticum aestivum (bread wheat)* | *Pseudomonas sp.* | 14880 | |
| *uncultured gamma proteobacterium* | *Acinetobacter sp.* | 22396 | |
| *uncultured organism* | *Streptococcus sp.* | 18567 | |
| *Bacteroidetes endosymbiont of Metaseiulus occidentalis* | *Sphingobacterium multivorum* | 18113 | |
| *uncultured Xanthomonadales bacterium* | *Stenotrophomonas sp.* | 24764 | |
| *uncultured Kocuria sp.* | *Kocuria sp.* | 11727 | |
| *uncultured Magnetococcus sp.* | *Magnetococcus sp.* | 17306 | |
| *uncultured organism* | *Morganella morganii* | 13974 | |
| *uncultured Stenotrophomonas sp.* | *Stenotrophomonas sp.* | 14445 | |
| *Solanum melongena (eggplant)* | *Moraxella osloensis* | 7664 | |
| *uncultured Frigoribacterium sp.* | *Frigoribacterium sp.* | 8729 | |
| *uncultured gamma proteobacterium* | *Acinetobacter sp.* | 22692 | |
| *Serratia plymuthica RVH1* | *Serratia plymuthica* | 12905 | |
| *uncultured organism* | *Streptococcus sp.* | 9583 | |
| *uncultured gamma proteobacterium* | *Pseudomonas sp.* | 14885 | |
| *uncultured organism* | *Streptococcus sp.* | 18518 | |
| *uncultured organism* | *Streptococcus sp.* | 18519 | |
| *uncultured proteobacterium* | *Moraxella osloensis* | 7312 | |
| *uncultured organism* | *Stenotrophomonas sp.* | 24912 | |
| *Kocuria palustris PEL* | *Kocuria palustris* | 4869 | |
| *Antarctic seawater bacterium Bsw10170* | *Psychrobacter sp.* | 8875 | |
| *bacterium enrichment culture clone Guo10* | *Acinetobacter sp.* | 6395 | |
| *uncultured organism* | *Streptococcus sp.* | 18569 | |
| *uncultured organism* | *Streptococcus sp.* | 9603 | |
| *uncultured organism* | *Morganella morganii* | 13970 | |
| *Lepisosteus oculatus (spotted gar)* | *Cutibacterium sp.* | 26069 | |
| *halophilic and alkaliphilic bacterium HN24* | *Alteribacillus sp.* | 4290 | |
| *uncultured Bacteroidetes bacterium* | *Sphingobacterium multivorum* | 8736 | |
| *uncultured organism* | *bacterium* | 26105 | |
| *Trichuris trichiura (human whipworm)* | *bacterium* | 9363 | |
| *Lepisosteus oculatus (spotted gar)* | *bacterium* | 11552 | |
| *gamma proteobacterium symbiont of Graphosoma rubrolineatum* | *Pantoea sp.* | 19435 | |
| *uncultured organism* | *Streptococcus sp.* | 10002 | |
| *uncultured gamma proteobacterium* | *Pseudomonas sp.* | 7868 | |
| *uncultured organism* | *Segatella copri* | 11683 | |
| *uncultured beta proteobacterium* | *Massilia sp.* | 15297 | |
| *Sargassum henslowianum* | *Pseudomonas sp.* | 15771 | |
| *Type-C symbiont of Plautia stali* | *Pantoea dispersa* | 11877 | |
| *Frankliniella occidentalis (western flower thrips)* | *Erwinia sp.* | 20685 | |
| *uncultured organism* | *Haemophilus parainfluenzae* | 13484 | |
| *uncultured organism* | *Lactobacillus gasseri* | 4438 | |
| *uncultured organism* | *Staphylococcus sp.* | 5125 | |
| *uncultured organism* | *Staphylococcus aureus* | 14222 | |
| *unidentified* | *Streptococcus sp.* | 6344 | |
| *Ceuthophilus sp.* | *Pseudomonas oleovorans* | 23177 | |
| *uncultured organism* | *bacterium* | 18471 | |
| *uncultured organism* | *Escherichia coli* | 26623 | |
| *bacterium 1A5* | *Chryseobacterium oncorhynchi* | 1979 | |
| *uncultured organism* | *Stenotrophomonas maltophilia* | 17898 | |
| *uncultured organism* | *Streptococcus sp.* | 9588 | |
| *uncultured microorganism* | *Helcococcus sp.* | 8325 | |
| *uncultured alpha proteobacterium* | *Agrobacterium sp.* | 26581 | |
| *Triticum urartu* | *bacterium* | 4985 | |
| *Trichuris trichiura (human whipworm)* | *bacterium* | 9366 | |
| *unidentified marine bacterioplankton* | *Salmonella enterica* | 21359 | |
| *human gut metagenome* | *bacterium* | 3703 | |
| *uncultured organism* | *Streptococcus sp.* | 4119 | |
| *uncultured gamma proteobacterium* | *Acinetobacter radioresistens* | 22712 | |
| *uncultured organism* | *Staphylococcus sp.* | 5119 | |
| *uncultured organism* | *bacterium* | 17984 | |
| *uncultured organism* | *bacterium* | 17911 | |
| *Coregonus lavaretus (common whitefish)* | *Cutibacterium acnes* | 20637 | |
| *uncultured organism* | *Neisseria sp.* | 26003 | |
| *uncultured organism* | *Lactobacillus crispatus* | 3520 | |
| *Triticum aestivum (bread wheat)* | *bacterium* | 11971 | |
| *Teleogryllus commodus* | *Pseudomonas sp.* | 24751 | |
| *uncultured organism* | *Staphylococcus aureus* | 15046 | |
| *uncultured organism* | *Streptococcus sp.* | 18501 | |
| *Trichuris trichiura (human whipworm)* | *bacterium* | 9368 | |
| *unidentified marine bacterioplankton* | *bacterium* | 12169 | |
| *Solanum torvum* | *Paracoccus sp.* | 12792 | |
| *halophilic and alkaliphilic bacterium HN24* | *Dolosigranulum pigrum* | 14546 | |
| *Coregonus lavaretus (common whitefish)* | *Cutibacterium acnes* | 1457 | |
| *Ambystoma mexicanum (axolotl)* | *Acinetobacter lwoffii* | 26268 | |
| *Solanum melongena (eggplant)* | *Moraxella osloensis* | 26387 | |
| *Solanum melongena (eggplant)* | *Moraxella osloensis* | 7286 | |
| *uncultured organism* | *Stenotrophomonas sp.* | 25790 | |
| *uncultured alpha proteobacterium* | *Agrobacterium sp.* | 26410 | |
| *Teleogryllus commodus* | *Enterobacteriaceae bacterium* | 4745 | |
| *halophilic and alkaliphilic bacterium HN24* | *Alteribacillus sp.* | 14551 | |
| *uncultured organism* | *Acinetobacter sp.* | 15599 | |
| *uncultured organism* | *Stenotrophomonas sp.* | 25791 | |
| *uncultured eubacterium WD264* | *bacterium* | 6823 | |
| *halophilic and alkaliphilic bacterium HN24* | *Alteribacillus sp.* | 21604 | |
| *uncultured organism* | *bacterium* | 9586 | |
| *uncultured organism* | *bacterium* | 17934 | |
| *uncultured organism* | *Morganella morganii* | 21474 | |
| *bacterium enrichment culture clone Guo10* | *Acinetobacter sp.* | 26388 | |
| *Ceuthophilus sp.* | *Pseudomonas sp.* | 26487 | |
| *uncultured gamma proteobacterium* | *Pseudomonas sp.* | 15975 | |
| *uncultured organism* | *Granulicatella adiacens* | 6828 | |
| *Solanum melongena (eggplant)* | *Moraxella osloensis* | 26075 | |
| *Eogystia hippophaecolus* | *Acinetobacter guillouiae* | 25143 | |
| *Ambystoma mexicanum (axolotl)* | *Acinetobacter lwoffii* | 26305 | |
| *uncultured organism* | *Morganella morganii* | 13077 | |
| *Ceuthophilus sp.* | *Pseudomonas sp.* | 26560 | |
| *Ambystoma mexicanum (axolotl)* | *Acinetobacter lwoffii* | 26024 | |
| *Coregonus lavaretus (common whitefish)* | *Cutibacterium acnes* | 26118 | |
| *uncultured cyanobacterium* | *bacterium* | 26032 | |
| *uncultured gamma proteobacterium* | *Acinetobacter johnsonii* | 22462 | |
| *Ambystoma mexicanum (axolotl)* | *Acinetobacter lwoffii* | 16338 | |
| *bacterium enrichment culture clone Guo10* | *Acinetobacter sp.* | 6394 | |
| *uncultured organism* | *Staphylococcus sp.* | 10024 | |
| *unidentified marine bacterioplankton* | *Lactobacillales group* | 3609 | |
| *BTEX-degrading bacterium enrichment culture* | *Stenotrophomonas maltophilia* | 66 | |
| *uncultured organism* | *bacterium* | 17943 | |
| *halophilic and alkaliphilic bacterium HN24* | *Alteribacillus sp.* | 21605 | |
| *Trichuris trichiura (human whipworm)* | *bacterium* | 18332 | |
| *uncultured compost bacterium* | *Corynebacterium sp.* | 934 | |
| *uncultured gamma proteobacterium* | *Acinetobacter johnsonii* | 22448 | |
| *Ceuthophilus sp.* | *Pseudomonas sp.* | 26431 | |
| *Ambystoma mexicanum (axolotl)* | *Acinetobacter lwoffii* | 26026 | |
| *uncultured organism* | *bacterium* | 10382 | |
| *uncultured organism* | *bacterium* | 17988 | |
| *Solanum melongena (eggplant)* | *Moraxella osloensis* | 26025 | |
| *Ambystoma mexicanum (axolotl)* | *Acinetobacter lwoffii* | 26584 | |
| *uncultured gamma proteobacterium* | *Acinetobacter johnsonii* | 26005 | |
| *gamma proteobacterium enrichment culture clone JF9-3* | *Pseudomonas stutzeri* | 26035 | |
| *uncultured organism* | *Staphylococcus sp.* | 14223 | |
| *uncultured gamma proteobacterium* | *Acinetobacter sp.* | 26554 | |
| *Solanum melongena (eggplant)* | *Moraxella osloensis* | 25996 | |
| *uncultured gamma proteobacterium* | *Acinetobacter sp.* | 16057 | |
| *human gut metagenome* | *Faecalibacterium prausnitzii* | 8225 | |
| *Triticum aestivum (bread wheat)* | *Pantoea agglomerans* | 26244 | |
| *Ambystoma mexicanum (axolotl)* | *Acinetobacter lwoffii* | 26100 | |

**Supplementary Table S2: Mis-assigned taxa by ARB**. A few operational taxonomic units were evaluated with BLAST where the species was disconcordant with the taxa genus and/or not a prokaryote, as assigned by ARB, or where an uncultured bacterium was seen across the mock microbial community suggesting it was either an expected mock microbial community member or a significant contaminant.

| **Species** | **Low DNA Qubit R1** | **Low DNA Qubit R2** | **Extraction Location Associated** | **PCR Location Associated** | **Known Contaminant Correlation R1** | **Known Contaminant Correlation R2** | **Decontam (neg control)** | **Biological Plausibility** | **Contaminant** |
| --- | --- | --- | --- | --- | --- | --- | --- | --- | --- |
| *S. bongori* | No | No | NA | NA | NA | NA | Possible | No | Yes |
| *S. aureus* | No | No | No | No | Yes | No | Possible | Yes | No |
| *D. pigrum* | No | No | No | No | No | No | Possible | Yes | No |
| *Corynebacterium sp.* | No | No | No | No | No | No | Possible | Yes | No |
| *C pseudodiphtheriticum* | No | No | No | No | No | No | Unlikely | Yes | No |
| *C. jeikeium* | No | No | No | No | No | No | Unlikely | Yes | No |
| *C. accolens* | No | No | No | No | No | No | Unlikely | Yes | No |
| *C. koseri* | No | No | No | No | Yes | No | Possible | Yes | No |
| *K. michiganensis* | No | No | No | No | No | No | Possible | Yes | No |
| *S. epidermidis* | No | Yes | No | No | No | No | Unlikely | Yes | No |
| *K. pneumoniae* | No | No | No | No | Yes | No | Unlikely | Yes | No |
| *B. cereus* | No | No | No | No | Yes | No | Possible | No | Yes |
| *K. oxytoca* | No | No | No | No | Yes* | No | Possible | Yes | No |
| *Acinetobacter sp.* | No | No | No | No | Yes | Yes | Possible | No | Yes |
| *M. catarrhalis* | No | No | No | No | No | No | Possible | Yes | No |
| *K. aerogenes* | No | No | No | No | No | No | Unlikely | Yes | No |
| *A. ursingii* | No | No | No | No | Yes | Yes* | Possible | No | Yes |
| *Acinetobacter sp.* | No | No | No | No | Yes | Yes | Possible | No | Yes |
| *E. coli* | No | No | No | No | Yes | Yes | Possible | Yes | No |
| *C. freundii* | No | No | No | Yes | No | Yes | Possible | Yes | No |
| *Pseudomonas sp.* | No | No | No | Yes | Yes | Yes* | Possible | No | Yes |
| *M. osloensis* | No | No | No | No | No | No | Unlikely | Yes | No |
| *Psychrobacter sp.* | No | No | No | No | Yes* | No | Possible | No | Yes |
| *A. lwoffii* | No | No | No | No | Yes* | Yes | Possible | No | Yes |
| *M. nonliquefaciens* | No | No | No | No | Yes | No | Possible | Yes | No |
| *Rhodococcus sp.* | No | No | No | No | Yes | No | Unlikely | No | Yes |
| *Enhydrobacter sp.* | No | No | Yes | No | No | Yes | Unlikely | No | Yes |
| *Alkanindiges sp.* | No | No | No | No | No | No | Unlikely | No | Yes |
| *P. stutzeri* | No | No | No | No | Yes | Yes | Possible | No | Yes |
| *S. marcescens* | No | No | No | No | No | No | Possible | Yes | No |
| *M. lincolnii* | No | No | No | No | Yes | Yes | Unlikely | Yes | No |
| *Chryseobacterium sp.* | No | No | No | Yes | No | Yes | Possible | No | Yes |
| *Ralstonia sp.* | No | Yes | No | Yes | Yes | Yes* | Unlikely | No | Yes |
| *Pseudomonas sp.* | No | No | No | Yes | Yes | Yes* | Possible | No | Yes |
| *Enterobacter sp.* | No | No | No | Yes | Yes* | Yes | Possible | No | Yes |
| *A. johnsonii* | No | No | No | No | Yes* | Yes | Unlikely | No | Yes |
| *Stenotrophomonas sp.* | No | No | No | No | Yes* | Yes* | Possible | No | Yes |
| *P. mirabilis* | No | No | No | No | Yes | No | Unlikely | No | Yes |
| *Magnetococcus sp.* | No | No | No | No | Yes | No | Unlikely | No | Yes |
| *E. faecalis* | No | No | No | No | Yes | Yes | Unlikely | No | Yes |
| *P. coleopterorum* | No | No | No | No | Yes | No | Possible | No | Yes |
| *A. parvus* | No | No | No | No | No | Yes | Unlikely | No | Yes |
| *A. johnsonii* | No | No | No | No | Yes* | Yes | Unlikely | No | Yes |
| *M. lacunata* | No | No | No | No | No | Yes | Unlikely | Yes | No |
| *P. proteolytica* | No | No | No | No | Yes | Yes | Unlikely | No | Yes |
| *P. gergoviae* | No | No | No | No | Yes | Yes | Possible | No | Yes |
| *M. tuberculosis* | No | No | No | No | No | No | Unlikely | Yes | No |
| *S. haemolyticus* | No | No | No | No | Yes | No | Unlikely | Yes | No |
| *S. maltophilia* | No | No | Yes | No | Yes | Yes* | Possible | No | Yes |
| *E. cloacae* | No | No | No | No | Yes | Yes | Unlikely | No | Yes |
| *S. sciuri* | No | No | No | No | No | No | Unlikely | Yes | No |
| *P. agglomerans* | No | No | No | No | Yes | Yes | Unlikely | No | Yes |
| *P. aeruginosa* | No | No | Yes | Yes | Yes* | Yes | Possible | No | Yes |
| *Streptococcus sp.* | No | No | No | No | Yes | Yes | Unlikely | Yes | No |
| *P. putida* | No | No | No | No | Yes* | Yes | Possible | No | Yes |
| *Klebsiella sp.* | No | No | No | No | Yes* | Yes | Unlikely | Yes | No |
| *M. morganii* | No | No | No | No | No | No | Unlikely | Yes | No |
| *C. acnes* | No | Yes | No | No | Yes | Yes | Unlikely | Yes | No |
| *P. oryzihabitans* | No | No | NA | NA | No | Yes | Unlikely | No | Yes |
| *M. morganii* | No | No | No | No | No | Yes | Unlikely | Yes | No |
| *P. frederiksbergensis* | No | No | No | No | Yes | Yes | Unlikely | No | Yes |
| *R. terrigena* | No | No | No | No | No | Yes | Possible | No | Yes |
| *S. dysgalactiae* | No | No | No | No | No | No | Unlikely | Yes | No |
| *Stenotrophomonas sp.* | No | No | No | No | Yes* | Yes* | Possible | No | Yes |
| *Moraxella sp.* | No | No | No | No | No | No | Unlikely | Yes | No |

**Supplementary Table S3: Determination of possible contaminants from low biomass anterior nares’ samples**.

| **Species** | **Comparison** | **Log-fold change** | **Standard error** | **adjusted p-value** |
| --- | --- | --- | --- | --- |
| ***Corynebacterium accolens*** | Persistent ~ Non-carrier | -0.95 | 0.30 | 0.03 |
| ***Corynebacterium jeikeium*** | Persistent ~ Non-carrier | -1.40 | 0.29 | <0.001 |
| ***Corynebacterium sp.*** | Persistent ~ Non-carrier | -1.66 | 0.28 | <0.001 |
| ***Dolosigranulum pigrum*** | Persistent ~ Non-carrier | -1.63 | 0.29 | <0.001 |
| ***Moraxella catarrhalis*** | Persistent ~ Non-carrier | -0.64 | 0.21 | 0.04 |
| ***Staphylococcus aureus*** | Persistent ~ Non-carrier | 5.50 | 0.24 | <0.001 |
| ***Staphylococcus aureus*** | Intermittent ~ Non-carrier | 1.45 | 0.29 | <0.001 |
| ***Staphylococcus epidermidis*** | Persistent ~ Non-carrier | -0.75 | 0.23 | 0.02 |

**Supplementary Table S4: Differential abundance of species by nasal colonisation status using ANCOM-BC2 displaying significant associations.** Log fold (natural log) changes as compared to *Staphylococcus aureus* non-carriers. Log-fold change between the compared groups shown with associated standard error and adjusted p-values. P-values adjusted with holm method.

| **Intercept** | **Odds Ratio** | **Lower C.I** | **Upper C.I.** |
| --- | --- | --- | --- |
| CST2 | 0.59 | 0.37 | 0.95 |
| CST3 | 0.86 | 0.56 | 1.32 |
| CST4 | 0.64 | 0.40 | 1.02 |
| CST5 | 0.22 | 0.11 | 0.43 |
| CST6 | 0.50 | 0.30 | 0.84 |
| CST7 | 2.00 | 1.41 | 2.84 |
| **Sex** | **Odds Ratio** | **Lower C.I** | **Upper C.I.** |
| CST2 | 0.63 | 0.38 | 1.04 |
| CST3 | 0.70 | 0.45 | 1.09 |
| CST4 | 0.69 | 0.42 | 1.14 |
| CST5 | 1.73 | 0.88 | 3.42 |
| CST6 | 0.53* | 0.30 | 0.93 |
| CST7 | 0.67* | 0.47 | 0.96 |
| **Current Smoker** | **Odds Ratio** | **Lower C.I** | **Upper C.I.** |
| CST2 | 0.59 | 0.16 | 2.17 |
| CST3 | 0.86 | 0.31 | 2.42 |
| CST4 | 0.60 | 0.16 | 2.24 |
| CST5 | 1.00 | 0.21 | 4.76 |
| CST6 | 0.79 | 0.21 | 2.94 |
| CST7 | 0.73 | 0.31 | 1.70 |
| **Pets** | **Odds Ratio** | **Lower C.I** | **Upper C.I.** |
| CST2 | 1.13 | 0.68 | 1.86 |
| CST3 | 0.87 | 0.55 | 1.36 |
| CST4 | 0.94 | 0.56 | 1.56 |
| CST5 | 0.68 | 0.35 | 1.35 |
| CST6 | 1.08 | 0.62 | 1.87 |
| CST7 | 0.93 | 0.65 | 1.33 |
| **Healthcare contact** | **Odds Ratio** | **Lower C.I** | **Upper C.I.** |
| CST2 | 0.87 | 0.39 | 1.94 |
| CST3 | 1.07 | 0.54 | 2.10 |
| CST4 | 0.71 | 0.30 | 1.67 |
| CST5 | 0.86 | 0.28 | 2.67 |
| CST6 | 0.77 | 0.31 | 1.90 |
| CST7 | 0.90 | 0.52 | 1.58 |
| **Chronic Skin Condition** | **Odds Ratio** | **Lower C.I** | **Upper C.I.** |
| CST2 | 1.00 | 0.45 | 2.20 |
| CST3 | 1.09 | 0.55 | 2.15 |
| CST4 | 0.79 | 0.34 | 1.86 |
| CST5 | 1.30 | 0.49 | 3.44 |
| CST6 | 0.89 | 0.36 | 2.19 |
| CST7 | 1.21 | 0.70 | 2.08 |
| **Asthma** | **Odds Ratio** | **Lower C.I** | **Upper C.I.** |
| CST2 | 1.05 | 0.41 | 2.69 |
| CST3 | 0.88 | 0.38 | 2.07 |
| CST4 | 1.28 | 0.52 | 3.15 |
| CST5 | 0.00 | 0.00 | 2.32e+201 |
| CST6 | 0.76 | 0.24 | 2.38 |
| CST7 | 0.62 | 0.30 | 1.27 |
| **Allergy** | **Odds Ratio** | **Lower C.I** | **Upper C.I.** |
| CST2 | 0.73 | 0.42 | 1.24 |
| CST3 | 0.77 | 0.48 | 1.23 |
| CST4 | 0.69 | 0.40 | 1.19 |
| CST5 | 0.73 | 0.36 | 1.46 |
| CST6 | 0.79 | 0.44 | 1.43 |
| CST7 | 0.90 | 0.62 | 1.30 |

**Supplementary Table S5: Multinomial logistic regression model of major lifestyle and clinical risk factors for *S. aureus* Community State Types.** Odds ratios are presented with 95% Confidence Intervals (C.I.). * p<0.05, ** p<0.01,  *** p<0.001.

## Supplementary Figures

**Supplementary** **Fig. S1: Study cohort and available 16S rRNA sequences.**

**Supplementary Fig. S2: Nasal samples processed for 16S rRNA gene sequencing from the CARRIAGE study with high-quality reads after mothur processing.** (a) all samples processed over the study period (b) box plot to show variation in the total read count (i.e. 16S rDNA gene copies) by carriage or control status.

**Supplementary Fig. S3: Identification of contaminants through batch effects and association with sample DNA concentration.** Y-axis represents log 10 of p-value of spearman’s correlation coefficient calculation, and horizontal ‘red-line’ intercepts y-axis at p=0.05. Vertical red-line intercepts spearman rho values at -0.2 and 0.2. **(a-e)** correlation of taxa relative abundance at a species level with each extraction location where samples from the first batch were processed. **(f-j)** correlation of taxa relative abundance at a species level with each PCR amplification location where samples from the first batch were processed. **(k-l)** correlation of taxa relative abundance at a species level with DNA concentration measurement (qubit) after PCR amplification from the first batch of samples processed **(k)** and the second batch of samples processed **(l)**.

**Supplementary Fig. S4: Heatmap demonstrating correlation of contaminants with one another.** All species were correlated with one another and ordered with hierarchical clustering of the spearman’s correlation coefficient rho values. Only significant correlation values are displayed (p<0.05). The correlation heatmap was then subset to allow for visualisation of examples that displayed clusters involving known contaminants that are highlighted with the red boxes. **(a)** subset plot from species-to-species correlation plot of the first batch of samples processed (n=1099). **(b)** subset plot from species-to-species correlation plot of the second batch of samples processed (n=767).

**Supplementary Fig. S5: Setting a rarefication threshold. (a-f)** Rarefication curves generated for samples after the removal of samples with less than a) 1,000 b) 5,000 c) 10,000 d) 15,000 e) 20,000 and f) 100,000 high-quality reads. **(g-l)** Histogram representing the slope of the rarefaction curves generated in figures **a to f** at the respective high-quality read count threshold below which samples were removed g) 1,000 h) 5,000 i) 10,000 j) 15,000 k) 20,000 and fl 100,000 high-quality reads.

**Supplementary Fig. S6: Gap statistic calculation results with number of clusters (k) against goodness of clustering measure (gap).**

**Supplementary Fig. S7: Alpha diversity of serially sampled study participants by colonisation status.** Alpha diversity is presented by multiple indices by carriage state (**a**) Persistent (**b**) Intermittent (**c**) non-carriers. Plot comparing alpha diversity of anterior nares by samples week number (one, two, or three) where available. Alpha diversity is calculated after rarefication of high-quality reads.

**Supplementary Fig. S8: Relative abundance of serially sampled *Staphylococcus aureus* persistent carriers at a genus level.** Relative abundance is calculated after rarefication of high-quality reads.

**Supplementary Fig. S9: Relative abundance of serially sampled *Staphylococcus aureus* intermittent carriers at a genus level.** Relative abundance is calculated after rarefication of high-quality reads.

**Supplementary Fig. S10: Relative abundance of serially sampled *Staphylococcus aureus* non-carriers at a genus level.** Relative abundance is calculated after rarefication of high-quality reads.

**Supplementary Fig. S11: Alpha and beta diversity from nasal samples by frequency of nasal swabs positive for *Staphylococcus aureus* amongst intermittent carriers. (a-b)** Box plot comparing alpha diversity (Shannon and Simpson) from nasal samples by the number of swabs positive (one or two) for *Staphylococcus aureus* from intermittent carriers.

**Supplementary Results**

**Random Forest model performance of combined dataset**

We assessed the performance of the random forest model to predict carriage status with the combined dataset including all samples above 500 reads and those rarefied above 10,000.

We determined the best number of candidates to be sampled at each tree (mtry) to be 4. The estimated test classification accuracy of the trained model was 70.6% (1-estimated out of box error). We determined the accuracy of the model with the test data. The overall accuracy of the model was 69.9% (C.I.= 62.3-76.2%, p=0.001) significantly exceeding the no information rate.
