# Supplementary material for: The nasal microbiome redefines Staphylococcus aureus colonisation
Source: Research Square preprint supplement (doi:10.21203/rs.3.rs-6079410/v1), 2025-04-29
Supplement: Supplementary file 2 [file 76bfbce36cddada2f1a16e08.xlsx]

## Sheet: Sheet6
Table S6: Sample accessions of 16S rRNA sequences used in this study.
ERS_accession	Lae_ame	sample_ID/Control	CARRIAGE_status	Participant_ID	S_aureus_culture
ERS2173269	25545_2	6673	Intermittent	2	No
ERS2173270	25545_14	6703	Persistent	4	Yes
ERS2173326	25545_21	6672	Persistent	5	Yes
ERS2173271	25545_26	6743	Intermittent	6	No
ERS2173272	25545_38	6716	Non-Carrier	7	No
ERS2173273	25545_50	6707	Intermittent	8	Yes
ERS2173281	25545_51	6689	Persistent	9	Yes
ERS2173329	25545_57	6768	Intermittent	10	Yes
ERS2173274	25545_62	6736	Non-Carrier	11	No
ERS2173275	25545_74	6711	Non-Carrier	12	No
ERS2173276	25545_86	6725	NA	14	No
ERS2159287	25662_1	Negative Control	NA	NA	control
ERS2159279	25662_2	6852	Persistent	16	Yes
ERS2159271	25662_3	6978	Non-Carrier	17	No
ERS2159263	25662_4	6960	Intermittent	18	No
ERS2159255	25662_5	6976	Non-Carrier	19	No
ERS2159247	25662_6	6958	Non-Carrier	20	No
ERS2159239	25662_7	6938	Non-Carrier	21	No
ERS2159231	25662_8	6923	Non-Carrier	22	No
ERS2159223	25662_9	6858	Persistent	23	Yes
ERS2159215	25662_10	6847	NA	24	No
ERS2159207	25662_11	6890	Non-Carrier	25	No
ERS2159199	25662_12	6853	Persistent	26	Yes
ERS2159286	25662_13	Positive Control	NA	NA	control
ERS2159278	25662_14	6860	Non-Carrier	7	No
ERS2159270	25662_15	6981	Intermittent	27	Yes
ERS2159262	25662_16	6963	Intermittent	28	No
ERS2159254	25662_17	6947	Persistent	29	Yes
ERS2159246	25662_18	6959	NA	30	Yes
ERS2159238	25662_19	6937	Non-Carrier	31	No
ERS2159230	25662_20	6921	Persistent	32	Yes
ERS2159222	25662_21	6849	Intermittent	33	No
ERS2159214	25662_22	6838	Intermittent	34	No
ERS2159206	25662_23	6899	Intermittent	35	Yes
ERS2159198	25662_24	6835	Intermittent	36	No
ERS2159285	25662_25	Negative Control	NA	NA	control
ERS2159277	25662_26	6843	Persistent	37	Yes
ERS2159269	25662_27	6982	Non-Carrier	38	No
ERS2159261	25662_28	6967	NA	39	Yes
ERS2159253	25662_29	6950	Intermittent	40	Yes
ERS2159245	25662_30	6946	Persistent	41	Yes
ERS2159237	25662_31	6936	Persistent	42	Yes
ERS2159229	25662_32	6919	Non-Carrier	43	No
ERS2159221	25662_33	6840	Non-Carrier	44	No
ERS2159213	25662_34	6891	Persistent	45	Yes
ERS2159205	25662_35	6881	Non-Carrier	46	No
ERS2159197	25662_36	Negative Control	NA	NA	control
ERS2159284	25662_37	6812	Non-Carrier	47	No
ERS2159276	25662_38	6851	Non-Carrier	48	No
ERS2159268	25662_39	6983	Non-Carrier	49	No
ERS2159260	25662_40	6968	Persistent	50	Yes
ERS2159252	25662_41	6952	Intermittent	51	No
ERS2159244	25662_42	6945	Persistent	52	Yes
ERS2159236	25662_43	6933	Persistent	53	Yes
ERS2159228	25662_44	6916	Persistent	54	Yes
ERS2159220	25662_45	6866	Persistent	55	Yes
ERS2159212	25662_46	6873	NA	56	No
ERS2159204	25662_47	6836	Non-Carrier	57	No
ERS2159196	25662_48	6906	Non-Carrier	58	No
ERS2159283	25662_49	6904	Non-Carrier	59	No
ERS2159275	25662_50	6905	Persistent	60	Yes
ERS2159267	25662_51	Negative Control	NA	NA	control
ERS2159259	25662_52	6969	Persistent	61	Yes
ERS2159251	25662_53	6953	Non-Carrier	62	No
ERS2159243	25662_54	6942	Non-Carrier	63	No
ERS2159235	25662_55	6932	Non-Carrier	64	No
ERS2159227	25662_56	6915	Persistent	65	Yes
ERS2159219	25662_57	6857	Non-Carrier	66	No
ERS2159211	25662_58	6864	Non-Carrier	67	No
ERS2159203	25662_59	6907	Non-Carrier	68	No
ERS2159195	25662_60	6897	Non-Carrier	69	No
ERS2159282	25662_61	6822	Non-Carrier	70	No
ERS2159274	25662_62	6878	Intermittent	71	No
ERS2159266	25662_63	6984	Intermittent	36	Yes
ERS2159258	25662_64	6971	Non-Carrier	72	No
ERS2159250	25662_65	6954	Persistent	73	Yes
ERS2159242	25662_66	6920	NA	74	No
ERS2159234	25662_67	6931	Non-Carrier	75	No
ERS2159226	25662_68	6903	Persistent	76	Yes
ERS2159218	25662_69	6839	Intermittent	77	Yes
ERS2159210	25662_70	6885	NA	78	No
ERS2159202	25662_71	6898	Non-Carrier	79	No
ERS2159194	25662_72	6879	Persistent	80	Yes
ERS2159281	25662_73	6833	Intermittent	81	No
ERS2159273	25662_74	6896	NA	NA	NA
ERS2159265	25662_75	6985	Non-Carrier	82	No
ERS2159257	25662_76	6972	Non-Carrier	83	No
ERS2159249	25662_77	6956	Non-Carrier	84	No
ERS2159241	25662_78	6940	Non-Carrier	85	No
ERS2159233	25662_79	6928	Non-Carrier	86	No
ERS2159225	25662_80	6894	Intermittent	87	No
ERS2159217	25662_81	6874	Persistent	88	Yes
ERS2159209	25662_82	6846	Persistent	89	Yes
ERS2159201	25662_83	6889	Non-Carrier	90	No
ERS2159193	25662_84	6870	Persistent	91	Yes
ERS2159280	25662_85	6841	Persistent	4	Yes
ERS2159272	25662_86	6977	Non-Carrier	92	No
ERS2159264	25662_87	6986	Intermittent	93	Yes
ERS2159256	25662_88	6974	Non-Carrier	94	No
ERS2159248	25662_89	6957	Persistent	95	Yes
ERS2159240	25662_90	6939	Non-Carrier	21	No
ERS2159232	25662_91	6926	Intermittent	96	Yes
ERS2159224	25662_92	6885	NA	78	No
ERS2159216	25662_93	6865	Non-Carrier	97	No
ERS2159208	25662_94	6908	Persistent	91	Yes
ERS2159200	25662_95	6871	NA	98	Yes
ERS2159192	25662_96	6861	Non-Carrier	99	No
ERS2526590	26071_1	8066	NA	39	Yes
ERS2526598	26071_2	Negative Control	NA	NA	control
ERS2526582	26071_3	8058	Persistent	100	Yes
ERS2526574	26071_4	Negative Control	NA	NA	control
ERS2526566	26071_5	8037	Non-Carrier	66	No
ERS2526558	26071_6	8029	Non-Carrier	38	No
ERS2526550	26071_7	8018	NA	56	No
ERS2526542	26071_8	8004	Persistent	101	Yes
ERS2526534	26071_9	6993	Non-Carrier	102	No
ERS2526526	26071_10	6850	Intermittent	103	Yes
ERS2526518	26071_11	6793	NA	104	Yes
ERS2526510	26071_12	6774	Persistent	105	Yes
ERS2526589	26071_13	8065	Non-Carrier	106	No
ERS2526597	26071_14	Positive Control	NA	NA	control
ERS2526581	26071_15	8057	Persistent	107	Yes
ERS2526573	26071_16	8048	Persistent	37	Yes
ERS2526565	26071_17	8036	Persistent	23	Yes
ERS2526557	26071_18	8027	Intermittent	103	Yes
ERS2526549	26071_19	8017	Intermittent	108	No
ERS2526541	26071_20	8003	Non-Carrier	109	No
ERS2526533	26071_21	6992	Non-Carrier	110	No
ERS2526525	26071_22	6785	Non-Carrier	64	No
ERS2526517	26071_23	6775	Intermittent	111	No
ERS2526509	26071_24	6765	Intermittent	112	Yes
ERS2526596	26071_26	Negative Control	NA	NA	control
ERS2526580	26071_27	8056	Non-Carrier	113	No
ERS2526572	26071_28	8046	Persistent	76	Yes
ERS2526564	26071_29	8035	Non-Carrier	58	No
ERS2526556	26071_30	8026	Intermittent	87	Yes
ERS2526548	26071_31	8016	Intermittent	28	No
ERS2526540	26071_32	8002	Non-Carrier	114	No
ERS2526532	26071_33	6991	Non-Carrier	115	No
ERS2526524	26071_34	6776	Non-Carrier	63	No
ERS2526516	26071_35	6766	Non-Carrier	116	No
ERS2526508	26071_36	6756	Non-Carrier	117	No
ERS2526587	26071_37	8063	Persistent	89	Yes
ERS2526595	26071_38	8073	Non-Carrier	67	No
ERS2526579	26071_39	8053	Persistent	26	Yes
ERS2526571	26071_40	8045	Non-Carrier	118	No
ERS2526563	26071_41	8034	Non-Carrier	70	No
ERS2526555	26071_42	8025	Non-Carrier	92	No
ERS2526547	26071_43	8015	Persistent	119	Yes
ERS2526539	26071_44	8001	Non-Carrier	57	No
ERS2526531	26071_45	6990	Intermittent	120	Yes
ERS2526523	26071_46	Negative Control	NA	NA	control
ERS2526515	26071_47	6757	NA	121	No
ERS2526507	26071_48	6828	Persistent	122	Yes
ERS2526586	26071_49	8062	Non-Carrier	97	No
ERS2526594	26071_50	8072	Intermittent	123	Yes
ERS2526578	26071_51	8052	Non-Carrier	124	No
ERS2526570	26071_52	8041	NA	125	Yes
ERS2526562	26071_53	8033	Non-Carrier	126	No
ERS2526554	26071_54	8023	Non-Carrier	83	No
ERS2526546	26071_55	8011	Persistent	127	Yes
ERS2526538	26071_56	6997	Non-Carrier	128	No
ERS2526530	26071_57	6989	Intermittent	129	Yes
ERS2526522	26071_58	6767	Intermittent	130	Yes
ERS2526514	26071_59	6829	Intermittent	131	No
ERS2526506	26071_60	6819	Persistent	29	Yes
ERS2526585	26071_61	8061	Non-Carrier	48	No
ERS2526593	26071_62	8070	Non-Carrier	62	No
ERS2526577	26071_63	8051	Non-Carrier	99	No
ERS2526569	26071_64	8040	Non-Carrier	132	No
ERS2526561	26071_65	8032	Non-Carrier	133	No
ERS2526553	26071_66	8021	Non-Carrier	46	No
ERS2526545	26071_67	8009	Intermittent	71	No
ERS2526537	26071_68	6996	Intermittent	134	Yes
ERS2526529	26071_69	6886	Persistent	119	Yes
ERS2526521	26071_70	6758	Non-Carrier	59	No
ERS2526513	26071_71	6820	Non-Carrier	128	No
ERS2526505	26071_72	6809	Non-Carrier	31	No
ERS2526584	26071_73	8060	Persistent	135	Yes
ERS2526592	26071_74	8068	NA	136	No
ERS2526576	26071_75	8050	Persistent	137	Yes
ERS2526568	26071_76	8039	Persistent	138	Yes
ERS2526560	26071_77	8031	Persistent	139	Yes
ERS2526552	26071_78	8020	Persistent	55	Yes
ERS2526544	26071_79	8007	Non-Carrier	140	No
ERS2526536	26071_80	6995	Intermittent	141	Yes
ERS2526528	26071_81	6877	NA	142	No
ERS2526520	26071_82	6811	NA	143	Yes
ERS2526512	26071_83	8010	NA	144	No
ERS2526504	26071_84	6800	Non-Carrier	145	No
ERS2526583	26071_85	8059	Persistent	146	Yes
ERS2526591	26071_86	8067	Persistent	147	Yes
ERS2526575	26071_87	8049	Non-Carrier	148	No
ERS2526567	26071_88	8038	Non-Carrier	19	No
ERS2526559	26071_89	8030	NA	149	Yes
ERS2526551	26071_90	8019	NA	150	Yes
ERS2526543	26071_91	8005	NA	151	Yes
ERS2526535	26071_92	6994	Non-Carrier	68	No
ERS2526527	26071_93	6859	Non-Carrier	118	No
ERS2526519	26071_94	6802	NA	152	No
ERS2526511	26071_95	6792	Intermittent	2	Yes
ERS2526503	26071_96	6782	Persistent	153	Yes
ERS2526415	26081_1	6673	Intermittent	2	No
ERS2526407	26081_2	6678	Non-Carrier	1	No
ERS2526423	26081_3	6718	Intermittent	154	Yes
ERS2526431	26081_4	6681	Intermittent	130	No
ERS2526447	26081_6	6716	Non-Carrier	7	No
ERS2526455	26081_7	6726	Non-Carrier	155	No
ERS2526463	26081_8	6679	Intermittent	156	Yes
ERS2526471	26081_9	6749	NA	3	No
ERS2526487	26081_11	6676	Non-Carrier	117	No
ERS2526495	26081_12	6813	Persistent	52	Yes
ERS2526416	26081_13	6703	Persistent	4	Yes
ERS2526408	26081_14	6706	NA	157	Yes
ERS2526424	26081_15	6683	Persistent	122	Yes
ERS2526432	26081_16	6795	Persistent	101	Yes
ERS2526440	26081_17	6709	Persistent	153	Yes
ERS2526448	26081_18	6697	Intermittent	158	Yes
ERS2526456	26081_19	6698	Non-Carrier	159	No
ERS2526464	26081_20	6675	Intermittent	112	Yes
ERS2526472	26081_21	6672	Persistent	5	Yes
ERS2526480	26081_22	6700	Non-Carrier	160	No
ERS2526488	26081_23	6740	Non-Carrier	161	No
ERS2526496	26081_24	6751	Persistent	50	Yes
ERS2526417	26081_25	6743	Intermittent	6	No
ERS2526409	26081_26	6720	NA	NA	NA
ERS2526425	26081_27	6712	Intermittent	131	Yes
ERS2526433	26081_28	6734	Non-Carrier	162	No
ERS2526441	26081_29	6695	Intermittent	134	Yes
ERS2526449	26081_30	6677	Intermittent	10	Yes
ERS2526457	26081_31	6686	Non-Carrier	163	No
ERS2526465	26081_32	6692	Intermittent	164	Yes
ERS2526473	26081_33	6690	Persistent	165	Yes
ERS2526481	26081_34	6668	Intermittent	166	Yes
ERS2526489	26081_35	6694	Persistent	167	Yes
ERS2526497	26081_36	6823	Non-Carrier	168	No
ERS2526418	26081_37	6716	Non-Carrier	7	No
ERS2526410	26081_38	6699	Persistent	169	Yes
ERS2526426	26081_39	6721	Intermittent	170	Yes
ERS2526434	26081_40	6680	Non-Carrier	171	No
ERS2526442	26081_41	6705	Non-Carrier	172	No
ERS2526450	26081_42	6804	NA	173	No
ERS2526458	26081_43	6691	Intermittent	174	Yes
ERS2526466	26081_44	6684	Non-Carrier	168	No
ERS2526474	26081_45	6722	Intermittent	175	Yes
ERS2526482	26081_46	6667	Non-Carrier	161	No
ERS2526490	26081_47	6730	Non-Carrier	43	No
ERS2526419	26081_49	6707	Intermittent	8	Yes
ERS2526411	26081_50	6671	Intermittent	176	No
ERS2526427	26081_51	6989	Intermittent	129	Yes
ERS2526435	26081_52	6715	Non-Carrier	145	No
ERS2526443	26081_53	6714	Persistent	177	Yes
ERS2526451	26081_54	6719	Non-Carrier	178	No
ERS2526459	26081_55	6701	Intermittent	179	Yes
ERS2526467	26081_56	6735	Non-Carrier	180	No
ERS2526475	26081_57	6768	Intermittent	10	Yes
ERS2526483	26081_58	6682	Intermittent	181	Yes
ERS2526491	26081_59	6731	Non-Carrier	182	No
ERS2526499	26081_60	Negative Control	NA	NA	control
ERS2526420	26081_61	6736	Non-Carrier	11	No
ERS2526412	26081_62	6688	Non-Carrier	183	No
ERS2526428	26081_63	6708	Intermittent	184	Yes
ERS2526436	26081_64	6724	Non-Carrier	44	No
ERS2526444	26081_65	6723	NA	185	No
ERS2526452	26081_66	6728	Persistent	186	Yes
ERS2526460	26081_67	6729	NA	187	Yes
ERS2526468	26081_68	6748	Non-Carrier	188	No
ERS2526476	26081_69	6786	NA	189	No
ERS2526484	26081_70	6674	Intermittent	190	Yes
ERS2526492	26081_71	6685	Non-Carrier	182	No
ERS2526500	26081_72	Positive Control	NA	NA	control
ERS2526421	26081_73	6711	Non-Carrier	12	No
ERS2526429	26081_75	6687	Persistent	192	Yes
ERS2526437	26081_76	6733	Intermittent	13	No
ERS2526453	26081_78	6737	Non-Carrier	90	No
ERS2526461	26081_79	6738	Persistent	5	Yes
ERS2526469	26081_80	6713	NA	193	Yes
ERS2526477	26081_81	6704	Non-Carrier	194	No
ERS2526485	26081_82	6693	Non-Carrier	195	No
ERS2526422	26081_85	6725	NA	14	No
ERS2526414	26081_86	6702	Persistent	196	Yes
ERS2526430	26081_87	6744	Non-Carrier	79	No
ERS2526438	26081_88	6747	Intermittent	176	No
ERS2526446	26081_89	6741	Non-Carrier	197	No
ERS2526454	26081_90	6746	Intermittent	156	No
ERS2526462	26081_91	6747	Intermittent	176	No
ERS2526470	26081_92	6750	Intermittent	33	Yes
ERS2526478	26081_93	6739	Intermittent	15	No
ERS2526486	26081_94	6795	Persistent	101	Yes
ERS2526494	26081_95	6759	Persistent	88	Yes
ERS2717125	27188_3	6805	Intermittent	8	No
ERS2717126	27188_4	6814	Intermittent	198	Yes
ERS2717127	27188_5	6824	Intermittent	158	No
ERS2717128	27188_6	6752	Persistent	135	Yes
ERS2717129	27188_7	6761	NA	199	No
ERS2717131	27188_9	6788	Persistent	200	Yes
ERS2717132	27188_10	6797	Persistent	54	Yes
ERS2717133	27188_11	6815	Intermittent	174	Yes
ERS2717134	27188_12	6825	Intermittent	164	No
ERS2717135	27188_13	6753	Intermittent	201	No
ERS2717136	27188_14	6762	Non-Carrier	1	No
ERS2717137	27188_15	6771	Non-Carrier	171	No
ERS2717138	27188_16	6816	NA	202	No
ERS2717140	27188_18	6754	NA	203	No
ERS2717141	27188_19	6763	Intermittent	204	No
ERS2717142	27188_20	6772	Intermittent	190	No
ERS2717143	27188_21	6781	Non-Carrier	85	No
ERS2717144	27188_22	6790	Non-Carrier	172	No
ERS2717145	27188_23	6799	Non-Carrier	163	No
ERS2717146	27188_24	6808	Persistent	32	Yes
ERS2717147	27188_25	6818	Intermittent	184	No
ERS2717148	27188_26	Negative Control	NA	NA	control
ERS2717149	27188_27	6827	Persistent	186	Yes
ERS2717150	27188_28	6755	NA	205	No
ERS2717151	27188_29	8155	Non-Carrier	25	No
ERS2717152	27188_30	8075	Non-Carrier	206	No
ERS2717153	27188_31	8076	Persistent	207	Yes
ERS2717154	27188_32	Negative Control	NA	NA	control
ERS2717156	27188_34	8078	Non-Carrier	208	No
ERS2717157	27188_35	8079	Persistent	80	Yes
ERS2717158	27188_36	8080	Persistent	45	Yes
ERS2717159	27188_37	8081	Persistent	16	Yes
ERS2717160	27188_38	8082	Intermittent	93	No
ERS2717161	27188_39	8083	Intermittent	209	No
ERS2717162	27188_40	8084	Non-Carrier	210	No
ERS2717163	27188_41	8085	Non-Carrier	211	No
ERS2717164	27188_42	8087	Intermittent	96	No
ERS2717165	27188_43	8088	Non-Carrier	212	No
ERS2717166	27188_44	8089	Non-Carrier	213	No
ERS2717167	27188_45	8090	Non-Carrier	214	No
ERS2717168	27188_46	8091	Non-Carrier	215	No
ERS2717169	27188_47	8092	Persistent	41	Yes
ERS2717170	27188_48	8093	Intermittent	35	No
ERS2717172	27188_50	8095	Intermittent	216	No
ERS2717173	27188_51	8096	Non-Carrier	217	No
ERS2717174	27188_52	8097	Non-Carrier	218	No
ERS2717175	27188_53	8098	Intermittent	219	No
ERS2717176	27188_54	8099	NA	220	No
ERS2717177	27188_55	8101	NA	221	No
ERS2717180	27188_58	8105	NA	74	Yes
ERS2717181	27188_59	8106	Non-Carrier	69	No
ERS2717182	27188_60	8108	Non-Carrier	222	No
ERS2717183	27188_61	8109	Non-Carrier	223	No
ERS2717184	27188_62	8110	Non-Carrier	224	No
ERS2717185	27188_63	8111	Persistent	42	Yes
ERS2717188	27188_66	8114	Intermittent	18	Yes
ERS2717189	27188_67	8115	Persistent	60	Yes
ERS2717190	27188_68	8116	Non-Carrier	225	No
ERS2717191	27188_69	8117	Non-Carrier	226	No
ERS2717192	27188_70	8118	Persistent	227	Yes
ERS2717193	27188_71	8119	Non-Carrier	84	No
ERS2717195	27188_73	8121	Persistent	228	Yes
ERS2717197	27188_75	8124	Non-Carrier	229	No
ERS2717198	27188_76	8126	Non-Carrier	94	No
ERS2717199	27188_77	8127	Persistent	230	Yes
ERS2717200	27188_78	8128	Non-Carrier	231	No
ERS2717201	27188_79	8129	Non-Carrier	20	No
ERS2717203	27188_81	8132	Intermittent	120	No
ERS2717204	27188_82	8133	Intermittent	51	Yes
ERS2717205	27188_83	8134	Persistent	73	Yes
ERS2717206	27188_84	8136	Persistent	100	Yes
ERS2717207	27188_85	8138	Non-Carrier	75	No
ERS2717208	27188_86	8139	Intermittent	27	No
ERS2717209	27188_87	8141	Non-Carrier	72	No
ERS2717211	27188_89	8143	Non-Carrier	232	No
ERS2717213	27188_91	8148	NA	30	Yes
ERS2717214	27188_92	8149	Persistent	95	Yes
ERS2717215	27188_93	8150	Intermittent	129	No
ERS2717216	27188_94	Positive Control	NA	NA	control
ERS2717217	27188_95	Negative Control	NA	NA	control
ERS2870554	27462_1	8652	Persistent	233	Yes
ERS2870546	27462_2	8635	Persistent	234	Yes
ERS2870562	27462_3	8670	NA	235	No
ERS2870570	27462_4	8683	Intermittent	236	Yes
ERS2870578	27462_5	8694	Non-Carrier	237	No
ERS2870586	27462_6	8719	Non-Carrier	238	No
ERS2870594	27462_7	8742	Persistent	239	Yes
ERS2870602	27462_8	8759	Non-Carrier	240	No
ERS2870610	27462_9	8779	Non-Carrier	241	No
ERS2870618	27462_10	8814	Non-Carrier	242	No
ERS2870626	27462_11	8842	Non-Carrier	243	No
ERS2870634	27462_12	8867	Non-Carrier	244	No
ERS2870555	27462_13	8653	Persistent	245	Yes
ERS2870563	27462_15	8672	Non-Carrier	246	No
ERS2870571	27462_16	8684	Intermittent	247	No
ERS2870579	27462_17	8703	Persistent	248	Yes
ERS2870587	27462_18	8722	Intermittent	249	No
ERS2870595	27462_19	8743	Non-Carrier	250	No
ERS2870603	27462_20	8761	Persistent	251	Yes
ERS2870611	27462_21	8792	Intermittent	252	No
ERS2870619	27462_22	8816	Non-Carrier	253	No
ERS2870627	27462_23	8845	Non-Carrier	254	No
ERS2870635	27462_24	8868	NA	255	Yes
ERS2870556	27462_25	8658	Non-Carrier	256	No
ERS2870564	27462_27	8673	Non-Carrier	257	No
ERS2870572	27462_28	8685	Persistent	258	Yes
ERS2870580	27462_29	8704	Non-Carrier	259	No
ERS2870588	27462_30	8724	Intermittent	260	Yes
ERS2870596	27462_31	8744	Persistent	261	Yes
ERS2870604	27462_32	8765	Intermittent	262	Yes
ERS2870612	27462_33	8794	Non-Carrier	263	No
ERS2870620	27462_34	8818	Persistent	264	Yes
ERS2870628	27462_35	8848	Non-Carrier	265	No
ERS2870636	27462_36	8871	Non-Carrier	266	No
ERS2870557	27462_37	8659	Intermittent	267	No
ERS2870565	27462_39	8678	Non-Carrier	268	No
ERS2870573	27462_40	Negative Control	NA	NA	control
ERS2870581	27462_41	8705	Non-Carrier	269	No
ERS2870589	27462_42	8727	Intermittent	270	No
ERS2870597	27462_43	8746	Non-Carrier	271	No
ERS2870605	27462_44	8769	Non-Carrier	272	No
ERS2870613	27462_45	8797	Intermittent	273	Yes
ERS2870621	27462_46	Negative Control	NA	NA	control
ERS2870629	27462_47	8849	NA	274	Yes
ERS2870637	27462_48	8872	Intermittent	275	Yes
ERS2870558	27462_49	8663	NA	276	Yes
ERS2870550	27462_50	8641	Non-Carrier	277	No
ERS2870566	27462_51	8679	Non-Carrier	278	No
ERS2870574	27462_52	8688	Intermittent	279	No
ERS2870582	27462_53	8708	Non-Carrier	280	No
ERS2870590	27462_54	8728	Non-Carrier	281	No
ERS2870598	27462_55	8747	Non-Carrier	282	No
ERS2870606	27462_56	8771	Persistent	283	Yes
ERS2870614	27462_57	8798	Persistent	284	Yes
ERS2870622	27462_58	8825	Non-Carrier	285	No
ERS2870630	27462_59	8851	Non-Carrier	286	No
ERS2870638	27462_60	8876	Non-Carrier	287	No
ERS2870559	27462_61	8664	Non-Carrier	288	No
ERS2870551	27462_62	8643	Persistent	289	Yes
ERS2870567	27462_63	8680	NA	290	Yes
ERS2870575	27462_64	8689	Non-Carrier	291	No
ERS2870583	27462_65	8713	Non-Carrier	292	No
ERS2870591	27462_66	8732	Intermittent	293	No
ERS2870599	27462_67	8749	Persistent	294	Yes
ERS2870607	27462_68	8772	Intermittent	295	No
ERS2870615	27462_69	8800	Non-Carrier	296	No
ERS2870623	27462_70	8826	Non-Carrier	297	No
ERS2870631	27462_71	8856	Non-Carrier	298	No
ERS2870639	27462_72	Negative Control	NA	NA	control
ERS2870560	27462_73	8666	Non-Carrier	299	No
ERS2870552	27462_74	8644	Persistent	300	Yes
ERS2870568	27462_75	8681	Non-Carrier	301	No
ERS2870576	27462_76	8690	Intermittent	302	Yes
ERS2870584	27462_77	8714	Persistent	303	Yes
ERS2870592	27462_78	8738	Non-Carrier	304	No
ERS2870600	27462_79	8752	Persistent	305	Yes
ERS2870608	27462_80	8775	Non-Carrier	306	No
ERS2870616	27462_81	8801	Non-Carrier	307	No
ERS2870624	27462_82	8827	Persistent	308	Yes
ERS2870632	27462_83	8863	Persistent	309	Yes
ERS2870640	27462_84	Positive Control	NA	NA	control
ERS2870561	27462_85	8667	Persistent	310	Yes
ERS2870553	27462_86	8649	Non-Carrier	311	No
ERS2870569	27462_87	8682	Persistent	312	Yes
ERS2870577	27462_88	8692	Non-Carrier	313	No
ERS2870585	27462_89	Negative Control	NA	NA	control
ERS2870593	27462_90	8739	Non-Carrier	314	No
ERS2870601	27462_91	8754	Non-Carrier	315	No
ERS2870609	27462_92	8778	Persistent	316	Yes
ERS2870617	27462_93	8811	Non-Carrier	317	No
ERS2870625	27462_94	8841	Non-Carrier	318	No
ERS2870633	27462_95	8864	Persistent	319	Yes
ERS2801552	27464_1	8431	Intermittent	320	No
ERS2801560	27464_3	8565	Non-Carrier	321	No
ERS2801568	27464_4	8453	Non-Carrier	322	No
ERS2801576	27464_5	8465	Intermittent	323	Yes
ERS2801592	27464_7	8604	Non-Carrier	324	No
ERS2801600	27464_8	8607	Intermittent	325	Yes
ERS2801608	27464_9	8617	Non-Carrier	326	No
ERS2801616	27464_10	8518	Non-Carrier	327	No
ERS2801624	27464_11	8527	Non-Carrier	328	No
ERS2801545	27464_14	8423	Non-Carrier	329	No
ERS2801569	27464_16	8455	Persistent	330	Yes
ERS2801577	27464_17	8466	Non-Carrier	331	No
ERS2801585	27464_18	8473	Intermittent	332	No
ERS2801601	27464_20	8611	Intermittent	333	Yes
ERS2801617	27464_22	8624	Non-Carrier	334	No
ERS2801625	27464_23	8529	Persistent	335	Yes
ERS2801633	27464_24	8540	Non-Carrier	336	No
ERS2801554	27464_25	8435	Non-Carrier	132	No
ERS2801546	27464_26	8424	Non-Carrier	337	No
ERS2801578	27464_29	8467	Non-Carrier	338	No
ERS2801586	27464_30	8586	Intermittent	339	Yes
ERS2801594	27464_31	8485	Intermittent	340	Yes
ERS2801602	27464_32	8612	Non-Carrier	341	No
ERS2801610	27464_33	8509	Non-Carrier	342	No
ERS2801618	27464_34	8520	Non-Carrier	343	No
ERS2801634	27464_36	8542	Persistent	344	Yes
ERS2801547	27464_38	8425	Persistent	345	Yes
ERS2801563	27464_39	8576	Non-Carrier	346	No
ERS2801571	27464_40	8580	Intermittent	347	No
ERS2801579	27464_41	8468	Non-Carrier	348	No
ERS2801587	27464_42	8475	Non-Carrier	349	No
ERS2801595	27464_43	8486	Non-Carrier	350	No
ERS2801603	27464_44	8498	Persistent	351	Yes
ERS2801611	27464_45	8510	Persistent	352	Yes
ERS2801619	27464_46	8521	Non-Carrier	353	No
ERS2801627	27464_47	8532	Non-Carrier	354	No
ERS2801556	27464_49	8439	Non-Carrier	355	No
ERS2801564	27464_51	8449	Persistent	356	Yes
ERS2801572	27464_52	8459	Non-Carrier	357	No
ERS2801588	27464_54	8590	NA	358	No
ERS2801604	27464_56	8500	Non-Carrier	359	No
ERS2801612	27464_57	8513	Non-Carrier	360	No
ERS2801620	27464_58	8522	Non-Carrier	361	No
ERS2801628	27464_59	8533	Non-Carrier	362	No
ERS2801636	27464_60	8547	Intermittent	363	No
ERS2801557	27464_61	8440	Persistent	364	Yes
ERS2801565	27464_63	8577	Non-Carrier	365	No
ERS2801573	27464_64	8462	Intermittent	366	Yes
ERS2801581	27464_65	8581	Non-Carrier	367	No
ERS2801589	27464_66	8478	Persistent	368	Yes
ERS2801597	27464_67	8488	Non-Carrier	369	No
ERS2801605	27464_68	8613	Non-Carrier	370	No
ERS2801621	27464_70	8523	Persistent	371	Yes
ERS2801637	27464_72	Negative Control	NA	NA	control
ERS2801558	27464_73	8442	NA	372	No
ERS2801550	27464_74	8553	Non-Carrier	373	No
ERS2801566	27464_75	8451	Intermittent	374	No
ERS2801582	27464_77	Negative Control	NA	NA	control
ERS2801590	27464_78	8479	Non-Carrier	375	No
ERS2801598	27464_79	8605	Non-Carrier	376	No
ERS2801606	27464_80	8616	Non-Carrier	377	No
ERS2801622	27464_82	8524	Non-Carrier	378	No
ERS2801630	27464_83	Negative Control	NA	NA	control
ERS2801559	27464_85	8443	Persistent	379	Yes
ERS2801567	27464_87	8452	Non-Carrier	380	No
ERS2801583	27464_89	8471	Intermittent	381	No
ERS2801591	27464_90	8593	Persistent	382	Yes
ERS2801599	27464_91	8491	Intermittent	383	Yes
ERS2801607	27464_92	8504	Intermittent	384	No
ERS2801615	27464_93	8623	Persistent	385	Yes
ERS2801623	27464_94	8626	Non-Carrier	386	No
ERS2801639	27464_96	Negative Control	NA	NA	control
ERS2756190	27495_3	8323	NA	221	No
ERS2756198	27495_4	8336	Intermittent	387	No
ERS2756206	27495_5	8345	Non-Carrier	124	No
ERS2756222	27495_7	8362	Non-Carrier	388	No
ERS2756239	27495_9	8384	Non-Carrier	389	No
ERS2756246	27495_10	8392	Non-Carrier	390	No
ERS2756254	27495_11	8404	Non-Carrier	391	No
ERS2756262	27495_12	8417	Persistent	392	Yes
ERS2756231	27495_20	8375	Non-Carrier	393	No
ERS2756240	27495_21	8385	Non-Carrier	394	No
ERS2756247	27495_22	8394	Intermittent	395	No
ERS2756255	27495_23	8405	Persistent	396	Yes
ERS2756237	27495_33	8386	Non-Carrier	397	No
ERS2756256	27495_35	8406	NA	398	Yes
ERS2756185	27495_37	8315	Non-Carrier	399	No
ERS2756225	27495_43	8366	NA	400	No
ERS2756241	27495_45	8387	Non-Carrier	401	No
ERS2756249	27495_46	8397	Non-Carrier	232	No
ERS2756257	27495_47	8407	Persistent	402	Yes
ERS2756186	27495_49	8317	Intermittent	403	Yes
ERS2756210	27495_53	8348	Intermittent	216	No
ERS2756234	27495_56	8378	Persistent	404	Yes
ERS2756242	27495_57	8388	Intermittent	405	No
ERS2756250	27495_58	8398	Intermittent	406	No
ERS2756258	27495_59	8409	Non-Carrier	407	No
ERS2756266	27495_60	8421	Persistent	408	Yes
ERS2756195	27495_63	8331	Non-Carrier	409	No
ERS2756211	27495_65	8349	Non-Carrier	410	No
ERS2756227	27495_67	8368	Non-Carrier	411	No
ERS2756235	27495_68	8380	Non-Carrier	412	No
ERS2756243	27495_69	8389	Persistent	230	Yes
ERS2756251	27495_70	8399	Non-Carrier	413	No
ERS2756259	27495_71	8411	Intermittent	414	No
ERS2756212	27495_77	8350	Non-Carrier	415	No
ERS2756220	27495_78	8360	Persistent	416	Yes
ERS2756228	27495_79	8370	Persistent	417	Yes
ERS2756244	27495_81	8390	Persistent	418	Yes
ERS2756252	27495_82	8400	Persistent	419	Yes
ERS2756260	27495_83	8412	Non-Carrier	213	No
ERS2756268	27495_84	Positive Control	NA	NA	control
ERS2756205	27495_88	8344	Non-Carrier	420	No
ERS2756238	27495_92	8383	Persistent	421	Yes
ERS2756253	27495_94	8403	Non-Carrier	422	No
ERS2765274	27497_1	Negative Control	NA	NA	control
ERS2765282	27497_3	8175	Non-Carrier	109	No
ERS2765290	27497_4	8194	Intermittent	405	Yes
ERS2765298	27497_5	8205	Non-Carrier	423	No
ERS2765306	27497_6	8218	Non-Carrier	389	No
ERS2765314	27497_7	8230	Intermittent	363	No
ERS2765322	27497_8	8241	Intermittent	424	No
ERS2765338	27497_10	8265	Non-Carrier	425	No
ERS2765354	27497_12	8293	Persistent	426	Yes
ERS2765267	27497_14	8157	NA	427	No
ERS2765283	27497_15	8176	Non-Carrier	113	No
ERS2765291	27497_16	8196	Non-Carrier	428	No
ERS2765299	27497_17	8206	Intermittent	429	Yes
ERS2765307	27497_18	8219	Intermittent	430	No
ERS2765315	27497_19	8231	Persistent	431	Yes
ERS2765323	27497_20	8243	Non-Carrier	432	No
ERS2765339	27497_22	8266	Non-Carrier	433	No
ERS2765355	27497_24	8294	Intermittent	434	Yes
ERS2765280	27497_25	8165	Non-Carrier	132	No
ERS2765268	27497_26	8158	Non-Carrier	399	No
ERS2765284	27497_27	8177	NA	435	No
ERS2765292	27497_28	8198	Persistent	436	Yes
ERS2765300	27497_29	8207	Non-Carrier	327	No
ERS2765308	27497_30	8221	Intermittent	141	No
ERS2765316	27497_31	8232	Persistent	437	Yes
ERS2765340	27497_34	8267	Non-Carrier	208	No
ERS2765356	27497_36	8295	Persistent	227	Yes
ERS2765276	27497_37	8166	Persistent	392	Yes
ERS2765269	27497_38	8159	Non-Carrier	110	No
ERS2765293	27497_40	8199	Non-Carrier	133	No
ERS2765301	27497_41	8209	Intermittent	438	No
ERS2765309	27497_42	8222	Intermittent	439	Yes
ERS2765357	27497_48	8296	NA	440	No
ERS2765286	27497_51	8182	Non-Carrier	441	No
ERS2765294	27497_52	8200	Persistent	137	Yes
ERS2765302	27497_53	8211	Persistent	127	Yes
ERS2765310	27497_54	8223	Non-Carrier	390	No
ERS2765318	27497_55	8237	Persistent	138	Yes
ERS2765326	27497_56	8247	NA	442	No
ERS2765342	27497_58	8272	Persistent	443	Yes
ERS2765358	27497_60	8298	Intermittent	108	No
ERS2765271	27497_62	8161	NA	444	Yes
ERS2765287	27497_63	8187	Non-Carrier	445	No
ERS2765295	27497_64	8202	Non-Carrier	114	No
ERS2765303	27497_65	8213	NA	446	No
ERS2765311	27497_66	8225	Persistent	421	Yes
ERS2765319	27497_67	8238	Intermittent	447	No
ERS2765343	27497_70	8273	Persistent	418	Yes
ERS2765279	27497_73	8169	Non-Carrier	449	No
ERS2765288	27497_75	8189	Intermittent	450	Yes
ERS2765296	27497_76	8203	Non-Carrier	451	No
ERS2765304	27497_77	8214	Non-Carrier	452	No
ERS2765312	27497_78	8228	Non-Carrier	453	No
ERS2765320	27497_79	8239	Non-Carrier	452	No
ERS2765328	27497_80	8251	Persistent	139	Yes
ERS2765344	27497_82	8276	Persistent	207	Yes
ERS2765281	27497_85	8171	Non-Carrier	454	No
ERS2765289	27497_87	8190	Non-Carrier	393	No
ERS2765297	27497_88	8204	Persistent	107	Yes
ERS2765313	27497_90	8229	Non-Carrier	455	No
ERS2891002	27673_2	8898	Non-Carrier	456	No
ERS2891010	27673_3	8912	Non-Carrier	457	No
ERS2891018	27673_4	8931	Non-Carrier	458	No
ERS2891026	27673_5	8956	Non-Carrier	459	No
ERS2891034	27673_6	8989	Persistent	460	Yes
ERS2891042	27673_7	9009	Non-Carrier	461	No
ERS2891050	27673_8	9027	Non-Carrier	462	No
ERS2891058	27673_9	9052	Non-Carrier	463	No
ERS2891066	27673_10	9076	Non-Carrier	464	No
ERS2890995	27673_13	8882	NA	465	No
ERS2891003	27673_14	8903	Persistent	466	Yes
ERS2891011	27673_15	8920	Non-Carrier	467	No
ERS2891019	27673_16	8933	Non-Carrier	468	No
ERS2891027	27673_17	8959	Intermittent	469	Yes
ERS2891035	27673_18	8991	Intermittent	470	No
ERS2891043	27673_19	9014	Persistent	471	Yes
ERS2891051	27673_20	9028	Persistent	472	Yes
ERS2891059	27673_21	9056	Persistent	473	Yes
ERS2891067	27673_22	9078	Persistent	474	Yes
ERS2891075	27673_23	9107	NA	475	Yes
ERS2890996	27673_25	8885	Non-Carrier	476	No
ERS2891004	27673_26	8904	Non-Carrier	477	No
ERS2891012	27673_27	8921	Non-Carrier	478	No
ERS2891020	27673_28	8934	NA	479	No
ERS2891028	27673_29	8961	NA	480	No
ERS2891036	27673_30	8993	Intermittent	481	Yes
ERS2891044	27673_31	9015	Non-Carrier	482	No
ERS2891052	27673_32	9033	Non-Carrier	483	No
ERS2891060	27673_33	9059	Persistent	484	Yes
ERS2891068	27673_34	9090	Non-Carrier	485	No
ERS2891076	27673_35	9108	Intermittent	486	No
ERS2890997	27673_37	8887	Non-Carrier	487	No
ERS2891005	27673_38	8906	Non-Carrier	488	No
ERS2891013	27673_39	8925	Non-Carrier	489	No
ERS2891021	27673_40	8935	Persistent	490	Yes
ERS2891029	27673_41	8967	Persistent	491	Yes
ERS2891037	27673_42	8994	Non-Carrier	492	No
ERS2891045	27673_43	9016	Persistent	493	Yes
ERS2891053	27673_44	9035	Non-Carrier	494	No
ERS2891061	27673_45	9062	Non-Carrier	495	No
ERS2891069	27673_46	9091	Non-Carrier	496	No
ERS2891077	27673_47	9109	Non-Carrier	497	No
ERS2890998	27673_49	Negative Control	NA	NA	control
ERS2891006	27673_50	8908	Intermittent	498	Yes
ERS2891014	27673_51	8926	Non-Carrier	499	No
ERS2891022	27673_52	8940	Non-Carrier	500	No
ERS2891030	27673_53	8968	Non-Carrier	501	No
ERS2891038	27673_54	8995	Persistent	502	Yes
ERS2891046	27673_55	9019	Intermittent	503	No
ERS2891054	27673_56	9037	Persistent	504	Yes
ERS2891062	27673_57	9063	Non-Carrier	505	No
ERS2891070	27673_58	9093	Non-Carrier	506	No
ERS2891078	27673_59	9110	Persistent	507	Yes
ERS2891086	27673_60	Negative Control	NA	NA	control
ERS2890999	27673_61	8890	Persistent	508	Yes
ERS2891007	27673_62	8909	NA	509	No
ERS2891015	27673_63	8927	Non-Carrier	510	No
ERS2891023	27673_64	8949	Non-Carrier	511	No
ERS2891031	27673_65	8971	Persistent	512	Yes
ERS2891039	27673_66	9003	Persistent	513	Yes
ERS2891047	27673_67	9022	Persistent	514	Yes
ERS2891055	27673_68	9043	Non-Carrier	515	No
ERS2891063	27673_69	9064	Non-Carrier	516	No
ERS2891071	27673_70	9094	Non-Carrier	517	No
ERS2891079	27673_71	9111	Persistent	518	Yes
ERS2891000	27673_73	8894	Non-Carrier	519	No
ERS2891008	27673_74	8910	Non-Carrier	520	No
ERS2891016	27673_75	8929	Non-Carrier	521	No
ERS2891024	27673_76	8950	Non-Carrier	522	No
ERS2891032	27673_77	8982	Non-Carrier	523	No
ERS2891040	27673_78	9005	Persistent	524	Yes
ERS2891048	27673_79	9025	Non-Carrier	525	No
ERS2891056	27673_80	9048	NA	526	No
ERS2891064	27673_81	9065	Persistent	527	Yes
ERS2891072	27673_82	Negative Control	NA	NA	control
ERS2891080	27673_83	9112	Non-Carrier	528	No
ERS2891001	27673_85	8896	Intermittent	529	No
ERS2891009	27673_86	8911	Non-Carrier	530	No
ERS2891017	27673_87	8930	Intermittent	531	No
ERS2891025	27673_88	Negative Control	NA	NA	control
ERS2891033	27673_89	8983	Non-Carrier	532	No
ERS2891041	27673_90	9008	Non-Carrier	533	No
ERS2891049	27673_91	Negative Control	NA	NA	control
ERS2891057	27673_92	9050	Non-Carrier	534	No
ERS2891065	27673_93	9067	Non-Carrier	535	No
ERS2891073	27673_94	9100	Non-Carrier	536	No
ERS4198363	32623_1	6089	Non-Carrier	537	No
ERS4198364	32623_2	9956	Non-Carrier	538	No
ERS4198381	32623_3	10811	Non-Carrier	539	No
ERS4198387	32623_4	10219	Intermittent	540	Yes
ERS4198395	32623_5	9875	Persistent	541	Yes
ERS4198402	32623_6	10072	Intermittent	542	Yes
ERS4198409	32623_7	10467	Persistent	543	Yes
ERS4198422	32623_8	9941	Intermittent	544	Yes
ERS4198426	32623_9	11000	Persistent	545	Yes
ERS4198436	32623_10	11019	Persistent	546	Yes
ERS4198444	32623_11	10267	Non-Carrier	547	No
ERS4198451	32623_12	10241	Persistent	548	Yes
ERS4198369	32623_13	6348	Non-Carrier	537	No
ERS4198367	32623_14	9844	Non-Carrier	489	No
ERS4198382	32623_15	10418	Intermittent	549	No
ERS4198386	32623_16	9909	Persistent	550	Yes
ERS4198394	32623_17	10373	Persistent	541	Yes
ERS4198401	32623_18	10256	Intermittent	542	No
ERS4198411	32623_19	10117	Persistent	543	Yes
ERS4198419	32623_20	10197	Intermittent	544	No
ERS4198428	32623_21	10000	Non-Carrier	551	No
ERS4198435	32623_22	11042	Persistent	546	Yes
ERS4198443	32623_23	10803	Non-Carrier	547	No
ERS4198452	32623_24	10389	Non-Carrier	552	No
ERS4198368	32623_25	6525	Non-Carrier	537	No
ERS4198373	32623_26	9721	Non-Carrier	497	No
ERS4198383	32623_27	10021	Persistent	553	Yes
ERS4198384	32623_28	10012	Persistent	554	Yes
ERS4198393	32623_29	10590	Intermittent	555	No
ERS4198403	32623_30	10856	Persistent	556	Yes
ERS4198413	32623_31	10100	Intermittent	557	Yes
ERS4198418	32623_32	10507	Intermittent	544	Yes
ERS4198430	32623_33	10445	Non-Carrier	551	No
ERS4198437	32623_34	10542	Persistent	558	Yes
ERS4198446	32623_35	10444	Non-Carrier	547	No
ERS4198456	32623_36	11327	Non-Carrier	559	No
ERS4198375	32623_37	10158	Persistent	560	Yes
ERS4198374	32623_38	9575	Non-Carrier	501	No
ERS4198385	32623_39	9481	Persistent	553	Yes
ERS4198388	32623_40	9747	Persistent	561	Yes
ERS4198396	32623_41	9945	Intermittent	555	Yes
ERS4198404	32623_42	11463	Persistent	556	Yes
ERS4198414	32623_43	10571	Intermittent	557	No
ERS4198420	32623_44	10457	Persistent	562	Yes
ERS4198429	32623_45	10716	Non-Carrier	551	No
ERS4198438	32623_46	10049	Persistent	558	Yes
ERS4198445	32623_47	10207	Persistent	563	Yes
ERS4198450	32623_48	11009	Non-Carrier	559	No
ERS4198370	32623_49	10503	Non-Carrier	564	No
ERS4198365	32623_50	9736	Non-Carrier	467	No
ERS4198379	32623_51	9946	Non-Carrier	565	No
ERS4198390	32623_52	10097	Persistent	561	Yes
ERS4198399	32623_53	10900	Persistent	566	Yes
ERS4198405	32623_54	10429	Persistent	556	Yes
ERS4198415	32623_55	10673	Intermittent	557	Yes
ERS4198423	32623_56	10917	Persistent	562	Yes
ERS4198431	32623_57	10396	Intermittent	567	No
ERS4198439	32623_58	10338	Persistent	558	Yes
ERS4198447	32623_59	10183	Intermittent	549	No
ERS4198454	32623_60	10269	Non-Carrier	564	No
ERS4198377	32623_61	10605	Persistent	563	Yes
ERS4198366	32623_62	10361	Non-Carrier	568	No
ERS4198378	32623_63	9949	Persistent	569	Yes
ERS4198389	32623_64	10102	Persistent	570	Yes
ERS4198397	32623_65	10341	Persistent	566	Yes
ERS4198406	32623_66	10316	Persistent	571	Yes
ERS4198417	32623_67	10687	Non-Carrier	572	No
ERS4198424	32623_68	10779	Persistent	562	Yes
ERS4198432	32623_69	10721	Intermittent	567	No
ERS4198441	32623_70	10211	Non-Carrier	573	No
ERS4198448	32623_71	11340	Non-Carrier	574	No
ERS4198457	32623_72	Negative Control	NA	NA	control
ERS4198380	32623_73	11169	Non-Carrier	575	No
ERS4198372	32623_74	9764	Persistent	484	Yes
ERS4198376	32623_75	10378	Non-Carrier	576	No
ERS4198392	32623_76	10145	Persistent	577	Yes
ERS4198398	32623_77	10613	Persistent	566	Yes
ERS4198407	32623_78	9865	Persistent	571	Yes
ERS4198421	32623_79	10502	Non-Carrier	572	No
ERS4198427	32623_80	10309	Persistent	545	Yes
ERS4198433	32623_81	10482	Intermittent	567	Yes
ERS4198440	32623_82	10415	Non-Carrier	573	No
ERS4198449	32623_83	10141	Intermittent	578	Yes
ERS4198455	32623_84	Positive Control	NA	NA	control
ERS4198412	32623_85	11253	Non-Carrier	539	No
ERS4198371	32623_86	9784	Intermittent	579	Yes
ERS4198408	32623_87	9982	Intermittent	540	No
ERS4198391	32623_88	10981	Non-Carrier	552	No
ERS4198400	32623_89	9695	Intermittent	542	No
ERS4198410	32623_90	10391	Persistent	571	Yes
ERS4198416	32623_91	10962	Non-Carrier	572	No
ERS4198425	32623_92	10283	Persistent	545	Yes
ERS4198434	32623_93	Negative Control	NA	NA	control
ERS4198442	32623_94	10834	Non-Carrier	573	No
ERS4198453	32623_95	10406	Non-Carrier	580	No
ERS4198458	32623_96	Negative Control	NA	NA	control
ERS4196109	33430_1	9407	Non-Carrier	581	No
ERS4196113	33430_2	9383	Non-Carrier	582	No
ERS4196119	33430_3	9436	Persistent	541	Yes
ERS4196132	33430_4	9466	Non-Carrier	296	No
ERS4196139	33430_5	9483	Intermittent	583	Yes
ERS4196148	33430_6	9503	Non-Carrier	584	No
ERS4196155	33430_7	9521	Persistent	585	Yes
ERS4196163	33430_8	9546	Non-Carrier	586	No
ERS4196173	33430_9	9562	Non-Carrier	587	No
ERS4196180	33430_10	9589	Intermittent	588	No
ERS4196186	33430_11	9615	Non-Carrier	589	No
ERS4196195	33430_12	9631	Persistent	590	Yes
ERS4196120	33430_13	9408	Persistent	570	Yes
ERS4196114	33430_14	9389	Persistent	591	Yes
ERS4196125	33430_15	9437	Non-Carrier	592	No
ERS4196133	33430_16	9467	NA	593	Yes
ERS4196140	33430_17	9486	Intermittent	594	No
ERS4196149	33430_18	9505	NA	595	No
ERS4196158	33430_19	9525	Non-Carrier	596	No
ERS4196182	33430_22	9590	NA	597	No
ERS4196189	33430_23	9617	Non-Carrier	598	No
ERS4196197	33430_24	9632	Non-Carrier	599	No
ERS4196117	33430_25	9414	NA	600	No
ERS4196110	33430_26	9395	Intermittent	601	No
ERS4196126	33430_27	9447	Intermittent	602	Yes
ERS4196134	33430_28	9468	Persistent	603	Yes
ERS4196150	33430_30	9507	Non-Carrier	604	No
ERS4196157	33430_31	9527	Persistent	560	Yes
ERS4196166	33430_32	9549	Persistent	605	Yes
ERS4196178	33430_33	9566	Persistent	606	Yes
ERS4196184	33430_34	9596	Intermittent	607	No
ERS4196188	33430_35	9618	Non-Carrier	608	No
ERS4196198	33430_36	9635	Non-Carrier	609	No
ERS4196121	33430_37	9419	Persistent	610	Yes
ERS4196111	33430_38	9400	Non-Carrier	611	No
ERS4196127	33430_39	9450	Non-Carrier	612	No
ERS4196141	33430_41	9492	NA	613	No
ERS4196156	33430_42	9508	Non-Carrier	614	No
ERS4196160	33430_43	9532	Non-Carrier	615	No
ERS4196165	33430_44	9551	Non-Carrier	616	No
ERS4196172	33430_45	9570	Non-Carrier	617	No
ERS4196190	33430_47	9620	Non-Carrier	618	No
ERS4196201	33430_48	9637	Non-Carrier	619	No
ERS4196118	33430_49	9422	Non-Carrier	620	No
ERS4196112	33430_50	9403	Non-Carrier	621	No
ERS4196128	33430_51	9451	Non-Carrier	622	No
ERS4196136	33430_52	9476	Non-Carrier	623	No
ERS4196143	33430_53	9496	Non-Carrier	624	No
ERS4196152	33430_54	9510	Non-Carrier	625	No
ERS4196161	33430_55	9533	Non-Carrier	626	No
ERS4196170	33430_56	9553	Non-Carrier	627	No
ERS4196175	33430_57	9572	NA	628	No
ERS4196181	33430_58	9600	Persistent	629	Yes
ERS4196192	33430_59	9621	Persistent	630	Yes
ERS4196199	33430_60	9638	Non-Carrier	631	No
ERS4196123	33430_61	9424	Intermittent	632	No
ERS4196116	33430_62	9404	Non-Carrier	633	No
ERS4196129	33430_63	9452	Non-Carrier	634	No
ERS4196146	33430_64	9479	Non-Carrier	576	No
ERS4196144	33430_65	9499	Persistent	635	Yes
ERS4196151	33430_66	9512	Non-Carrier	636	No
ERS4196162	33430_67	9536	Non-Carrier	637	No
ERS4196176	33430_69	9583	Non-Carrier	638	No
ERS4196187	33430_70	9602	Non-Carrier	639	No
ERS4196200	33430_72	Negative Control	NA	NA	control
ERS4196122	33430_73	9425	Persistent	640	Yes
ERS4196108	33430_74	9405	Persistent	561	Yes
ERS4196130	33430_75	9463	Non-Carrier	641	No
ERS4196137	33430_76	9480	Persistent	233	Yes
ERS4196147	33430_77	9501	Non-Carrier	642	No
ERS4196153	33430_78	9513	Non-Carrier	643	No
ERS4196159	33430_79	9538	Non-Carrier	644	No
ERS4196171	33430_80	9557	Non-Carrier	645	No
ERS4196177	33430_81	9585	Non-Carrier	646	No
ERS4196191	33430_82	9609	Non-Carrier	647	No
ERS4196196	33430_83	9625	Persistent	648	Yes
ERS4196202	33430_84	Positive Control	NA	NA	control
ERS4196124	33430_85	9427	NA	649	No
ERS4196115	33430_86	9406	Non-Carrier	650	No
ERS4196131	33430_87	9464	Intermittent	651	No
ERS4196138	33430_88	9482	Persistent	652	Yes
ERS4196145	33430_89	9502	Persistent	577	Yes
ERS4196154	33430_90	9514	Intermittent	653	No
ERS4196164	33430_91	9544	Persistent	654	Yes
ERS4196168	33430_92	9561	Intermittent	655	No
ERS4196179	33430_93	9588	Non-Carrier	656	No
ERS4196185	33430_94	9611	Persistent	657	Yes
ERS4196193	33430_95	9627	NA	658	No
ERS4196012	33433_1	9167	Persistent	659	Yes
ERS4196017	33433_2	9142	Non-Carrier	660	No
ERS4196028	33433_3	9183	Non-Carrier	661	No
ERS4196036	33433_4	9204	NA	662	Yes
ERS4196043	33433_5	9226	Non-Carrier	663	No
ERS4196050	33433_6	9245	Persistent	664	Yes
ERS4196058	33433_7	9273	Persistent	665	Yes
ERS4196068	33433_8	9293	Persistent	666	Yes
ERS4196075	33433_9	9309	Persistent	667	Yes
ERS4196085	33433_10	9333	Persistent	550	Yes
ERS4196090	33433_11	9379	Persistent	668	Yes
ERS4196100	33433_12	9370	Intermittent	669	No
ERS4196022	33433_13	Negative Control	NA	NA	control
ERS4196019	33433_14	9144	Non-Carrier	670	No
ERS4196030	33433_15	9185	Non-Carrier	671	No
ERS4196037	33433_16	9208	Persistent	569	Yes
ERS4196044	33433_17	9227	Persistent	672	Yes
ERS4196049	33433_18	9248	Non-Carrier	538	No
ERS4196060	33433_19	9274	Non-Carrier	673	No
ERS4196069	33433_20	9294	NA	674	No
ERS4196078	33433_21	9313	Non-Carrier	675	No
ERS4196086	33433_22	9335	Non-Carrier	676	No
ERS4196093	33433_23	9355	Non-Carrier	677	No
ERS4196103	33433_24	9373	Non-Carrier	678	No
ERS4196023	33433_25	9171	Persistent	679	Yes
ERS4196014	33433_26	9149	NA	680	Yes
ERS4196031	33433_27	9188	Intermittent	481	No
ERS4196038	33433_28	9209	Non-Carrier	568	No
ERS4196045	33433_29	Negative Control	NA	NA	control
ERS4196053	33433_30	9252	Persistent	681	Yes
ERS4196061	33433_31	9276	Non-Carrier	682	No
ERS4196070	33433_32	9296	Persistent	683	Yes
ERS4196076	33433_33	9316	Non-Carrier	684	No
ERS4196083	33433_34	9337	Non-Carrier	685	No
ERS4196092	33433_35	9357	Intermittent	686	Yes
ERS4196104	33433_36	9374	Non-Carrier	687	No
ERS4196024	33433_37	9174	Non-Carrier	688	No
ERS4196018	33433_38	9151	Non-Carrier	689	No
ERS4196029	33433_39	9190	Non-Carrier	690	No
ERS4196051	33433_40	9212	NA	691	Yes
ERS4196046	33433_41	9272	Persistent	692	Yes
ERS4196055	33433_42	9254	Intermittent	693	Yes
ERS4196064	33433_43	9277	Non-Carrier	694	No
ERS4196071	33433_44	9297	NA	695	No
ERS4196079	33433_45	9345	NA	696	No
ERS4196087	33433_46	9340	Persistent	697	Yes
ERS4196095	33433_47	9358	Non-Carrier	698	No
ERS4196099	33433_48	9377	Non-Carrier	699	No
ERS4196021	33433_49	9175	Non-Carrier	700	No
ERS4196015	33433_50	9152	Non-Carrier	701	No
ERS4196033	33433_51	9194	Persistent	702	Yes
ERS4196039	33433_52	9214	Non-Carrier	703	No
ERS4196059	33433_53	9234	Non-Carrier	565	No
ERS4196054	33433_54	9261	Persistent	704	Yes
ERS4196063	33433_55	9280	Non-Carrier	705	No
ERS4196072	33433_56	9298	Intermittent	706	No
ERS4196081	33433_57	9321	Non-Carrier	707	No
ERS4196089	33433_58	9341	Persistent	708	Yes
ERS4196096	33433_59	9359	Non-Carrier	709	No
ERS4196102	33433_60	Negative Control	NA	NA	control
ERS4196025	33433_61	9179	Non-Carrier	710	No
ERS4196013	33433_62	9153	Persistent	711	Yes
ERS4196035	33433_63	9200	Non-Carrier	712	No
ERS4196040	33433_64	9215	Non-Carrier	713	No
ERS4196048	33433_65	9235	Non-Carrier	714	No
ERS4196057	33433_66	9266	Non-Carrier	609	No
ERS4196065	33433_67	9285	Persistent	715	Yes
ERS4196073	33433_68	9299	Non-Carrier	716	No
ERS4196082	33433_69	9328	Non-Carrier	717	No
ERS4196088	33433_70	9343	Non-Carrier	718	No
ERS4196097	33433_71	9360	Intermittent	719	No
ERS4196105	33433_72	Negative Control	NA	NA	control
ERS4196027	33433_73	9180	Persistent	720	Yes
ERS4196016	33433_74	9157	Non-Carrier	721	No
ERS4196034	33433_75	9201	Non-Carrier	722	No
ERS4196042	33433_76	9216	Non-Carrier	723	No
ERS4196052	33433_77	9242	Non-Carrier	724	No
ERS4196056	33433_78	9268	Non-Carrier	725	No
ERS4196067	33433_79	9291	NA	726	Yes
ERS4196074	33433_80	Negative Control	NA	NA	control
ERS4196080	33433_81	9329	Persistent	727	Yes
ERS4196091	33433_82	9351	Non-Carrier	631	No
ERS4196098	33433_83	9362	Persistent	493	Yes
ERS4196106	33433_84	Positive Control	NA	NA	control
ERS4196026	33433_85	9181	Persistent	728	Yes
ERS4196020	33433_86	9163	Non-Carrier	729	No
ERS4196032	33433_87	9203	Persistent	730	Yes
ERS4196041	33433_88	9222	Persistent	731	Yes
ERS4196047	33433_89	9243	Non-Carrier	732	No
ERS4196062	33433_90	9230	Non-Carrier	733	No
ERS4196066	33433_91	9292	Non-Carrier	734	No
ERS4196077	33433_92	9307	NA	735	No
ERS4196084	33433_93	9331	Persistent	736	Yes
ERS4196094	33433_94	9352	Non-Carrier	737	No
ERS4196101	33433_95	9365	Intermittent	738	No
ERS4196107	33433_96	Negative Control	NA	NA	control
ERS5071683	35228_1	8493	Non-Carrier	739	No
ERS5071677	35228_2	8470	Non-Carrier	407	No
ERS5071690	35228_3	8526	Persistent	431	Yes
ERS5071698	35228_4	8556	Non-Carrier	391	No
ERS5071706	35228_5	8574	Intermittent	740	No
ERS5071714	35228_6	8592	Persistent	419	Yes
ERS5071721	35228_7	8470	Non-Carrier	407	No
ERS5071730	35228_8	8493	Non-Carrier	739	No
ERS5071738	35228_9	8526	Persistent	431	Yes
ERS5071748	35228_10	8556	Non-Carrier	391	No
ERS5071754	35228_11	8574	Intermittent	740	No
ERS5071765	35228_12	8592	Persistent	419	Yes
ERS5071685	35228_13	8494	Non-Carrier	741	No
ERS5071675	35228_14	8472	Non-Carrier	448	No
ERS5071691	35228_15	8530	Persistent	443	Yes
ERS5071700	35228_16	8557	Non-Carrier	329	No
ERS5071708	35228_17	8575	Non-Carrier	409	No
ERS5071715	35228_18	8596	Intermittent	403	Yes
ERS5071723	35228_19	8472	Non-Carrier	448	No
ERS5071731	35228_20	8494	Non-Carrier	741	No
ERS5071739	35228_21	8530	Persistent	443	Yes
ERS5071746	35228_22	8557	Non-Carrier	329	No
ERS5071755	35228_23	8575	Non-Carrier	409	No
ERS5071762	35228_24	8596	Intermittent	403	Yes
ERS5071682	35228_25	8502	Non-Carrier	454	No
ERS5071676	35228_26	8474	Non-Carrier	455	No
ERS5071692	35228_27	8534	Non-Carrier	433	No
ERS5071699	35228_28	8559	Non-Carrier	742	No
ERS5071707	35228_29	8578	Intermittent	743	No
ERS5071717	35228_30	8595	Non-Carrier	744	No
ERS5071724	35228_31	8474	Non-Carrier	455	No
ERS5071735	35228_32	8502	Non-Carrier	454	No
ERS5071740	35228_33	8534	Non-Carrier	433	No
ERS5071747	35228_34	8559	Non-Carrier	742	No
ERS5071756	35228_35	8578	Intermittent	743	No
ERS5071763	35228_36	8595	Non-Carrier	744	No
ERS5071684	35228_37	8503	Non-Carrier	425	No
ERS5071674	35228_38	8477	Non-Carrier	745	No
ERS5071693	35228_39	8535	Non-Carrier	746	No
ERS5071701	35228_40	8562	Intermittent	747	Yes
ERS5071709	35228_41	8579	Non-Carrier	322	No
ERS5071716	35228_42	Negative Control	NA	NA	control
ERS5071725	35228_43	8477	Non-Carrier	745	No
ERS5071732	35228_44	8503	Non-Carrier	425	No
ERS5071741	35228_45	8535	Non-Carrier	746	No
ERS5071749	35228_46	8562	Intermittent	747	Yes
ERS5071757	35228_47	8579	Non-Carrier	322	No
ERS5071764	35228_48	Negative Control	NA	NA	control
ERS5071686	35228_49	8506	Persistent	748	Yes
ERS5071678	35228_50	8481	Non-Carrier	749	No
ERS5071694	35228_51	8538	Non-Carrier	750	No
ERS5071702	35228_52	8563	Persistent	751	Yes
ERS5071710	35228_53	8582	Non-Carrier	752	No
ERS5071718	35228_54	Positive Control	NA	NA	control
ERS5071726	35228_55	8481	Non-Carrier	749	No
ERS5071733	35228_56	8506	Persistent	748	Yes
ERS5071742	35228_57	8538	Non-Carrier	750	No
ERS5071751	35228_58	8563	Persistent	751	Yes
ERS5071758	35228_59	8582	Non-Carrier	752	No
ERS5071766	35228_60	Positive Control	NA	NA	control
ERS5071688	35228_61	8508	Intermittent	424	Yes
ERS5071679	35228_62	8482	Non-Carrier	753	No
ERS5071695	35228_63	8547	Intermittent	363	No
ERS5071703	35228_64	8566	Persistent	396	Yes
ERS5071711	35228_65	8584	Non-Carrier	754	No
ERS5071722	35228_66	Positive Control	NA	NA	control
ERS5071728	35228_67	8482	Non-Carrier	753	No
ERS5071734	35228_68	8508	Intermittent	424	Yes
ERS5071743	35228_69	8547	Intermittent	363	No
ERS5071750	35228_70	8566	Persistent	396	Yes
ERS5071759	35228_71	8584	Non-Carrier	754	No
ERS5071767	35228_72	Positive Control	NA	NA	control
ERS5071687	35228_73	9517	Non-Carrier	281	No
ERS5071680	35228_74	8490	Intermittent	755	No
ERS5071696	35228_75	8550	Intermittent	447	No
ERS5071704	35228_76	8571	Intermittent	434	No
ERS5071712	35228_77	8588	Intermittent	756	No
ERS5071719	35228_78	Negative Control	NA	NA	control
ERS5071727	35228_79	8490	Intermittent	755	No
ERS5071736	35228_80	9517	Non-Carrier	281	No
ERS5071744	35228_81	8550	Intermittent	447	No
ERS5071752	35228_82	8571	Intermittent	434	No
ERS5071760	35228_83	8588	Intermittent	756	No
ERS5071768	35228_84	Negative Control	NA	NA	control
ERS5071689	35228_85	8519	Intermittent	757	Yes
ERS5071681	35228_86	8492	Non-Carrier	758	No
ERS5071697	35228_87	8555	Persistent	759	Yes
ERS5071705	35228_88	8572	Intermittent	374	No
ERS5071713	35228_89	8589	Non-Carrier	132	No
ERS5071720	35228_90	Negative Control	NA	NA	control
ERS5071729	35228_91	8492	Non-Carrier	758	No
ERS5071737	35228_92	8519	Intermittent	757	Yes
ERS5071745	35228_93	8555	Persistent	759	Yes
ERS5071753	35228_94	8572	Intermittent	374	No
ERS5071761	35228_95	8589	Non-Carrier	132	No
ERS5071769	35228_96	Negative Control	NA	NA	control
ERS12427121	45485_1	9536	Non-carrier	637	No
ERS12427114	45485_2	9505	NA	595	No
ERS12427129	45485_3	9201	Non-carrier	722	No
ERS12427136	45485_4	9227	Persistent	672	Yes
ERS12427144	45485_5	9261	Persistent	704	Yes
ERS12427154	45485_6	9294	NA	674	No
ERS12427064	45485_7	9313	Non-carrier	675	No
ERS12427074	45485_8	9352	Non-carrier	737	No
ERS12427081	45485_9	9373	Non-carrier	678	No
ERS12427089	45485_10	9408	Persistent	570	Yes
ERS12427097	45485_11	8908	Intermittent	498	Yes
ERS12427106	45485_12	8876	Non-carrier	287	No
ERS12427122	45485_13	9171	Persistent	679	Yes
ERS12427113	45485_14	9507	Non-carrier	604	No
ERS12427130	45485_15	9203	Persistent	730	Yes
ERS12427138	45485_16	Negative Control	NA	NA	control
ERS12427145	45485_17	9268	Non-carrier	725	No
ERS12427153	45485_18	9296	Persistent	683	Yes
ERS12427066	45485_19	9321	Non-carrier	707	No
ERS12427073	45485_20	9379	Persistent	668	Yes
ERS12427082	45485_21	9374	Non-carrier	687	No
ERS12427090	45485_22	8927	Non-carrier	510	No
ERS12427099	45485_23	8906	Non-carrier	488	No
ERS12427105	45485_24	8882	NA	465	No
ERS12427123	45485_25	9174	Non-carrier	688	No
ERS12427115	45485_26	9508	Non-carrier	614	No
ERS12427131	45485_27	9204	NA	662	Yes
ERS12427142	45485_28	9234	Non-carrier	565	No
ERS12427147	45485_29	9274	Non-carrier	673	No
ERS12427155	45485_30	9297	NA	695	No
ERS12427069	45485_31	9329	Persistent	727	Yes
ERS12427076	45485_32	9345	NA	696	No
ERS12427083	45485_33	9377	Non-carrier	699	No
ERS12427091	45485_34	8926	Non-carrier	499	No
ERS12427098	45485_35	8903	Persistent	466	Yes
ERS12427107	45485_36	9536	Non-carrier	637	No
ERS12427126	45485_37	9175	Non-carrier	700	No
ERS12427116	45485_38	9512	Non-carrier	636	No
ERS12427132	45485_39	9208	Persistent	569	Yes
ERS12427140	45485_40	9242	Non-carrier	724	No
ERS12427148	45485_41	9276	Non-carrier	682	No
ERS12427156	45485_42	9298	Intermittent	706	No
ERS12427068	45485_43	9333	Persistent	550	Yes
ERS12427075	45485_44	9355	Non-carrier	677	No
ERS12427084	45485_45	9383	Non-carrier	582	No
ERS12427092	45485_46	8925	Non-carrier	489	No
ERS12427100	45485_47	8896	Intermittent	529	No
ERS12427108	45485_48	9201	Non-carrier	722	No
ERS12427124	45485_49	9180	Intermittent	720	Yes
ERS12427118	45485_50	9521	Persistent	585	Yes
ERS12427133	45485_51	9209	Non-carrier	568	No
ERS12427141	45485_52	9243	Non-carrier	732	No
ERS12427149	45485_53	Negative Control	NA	NA	control
ERS12427157	45485_54	9299	Non-carrier	716	No
ERS12427067	45485_55	9335	Non-carrier	676	No
ERS12427077	45485_56	9357	Intermittent	686	Yes
ERS12427085	45485_57	9389	Persistent	591	Yes
ERS12427095	45485_58	8921	Non-carrier	478	No
ERS12427101	45485_59	8890	Persistent	508	Yes
ERS12427109	45485_60	9227	Persistent	672	Yes
ERS12427125	45485_61	9181	Persistent	728	Yes
ERS12427117	45485_62	9525	Non-carrier	596	No
ERS12427134	45485_63	9212	NA	691	Yes
ERS12427139	45485_64	9248	Non-carrier	538	No
ERS12427150	45485_65	9285	Persistent	715	Yes
ERS12427158	45485_66	Negative Control	NA	NA	control
ERS12427070	45485_67	9340	Persistent	697	Yes
ERS12427079	45485_68	9359	Non-carrier	709	No
ERS12427086	45485_69	9395	Intermittent	601	No
ERS12427093	45485_70	8920	Non-carrier	467	No
ERS12427102	45485_71	Negative Control	NA	NA	control
ERS12427110	45485_72	9261	Persistent	704	Yes
ERS12427127	45485_73	9185	Non-carrier	671	No
ERS12427119	45485_74	9527	Persistent	560	Yes
ERS12427137	45485_75	9222	Persistent	731	Yes
ERS12427143	45485_76	9252	Persistent	681	Yes
ERS12427151	45485_77	9291	NA	726	Yes
ERS12427065	45485_78	9307	NA	735	No
ERS12427071	45485_79	9341	Persistent	708	Yes
ERS12427078	45485_80	9362	Persistent	493	Yes
ERS12427087	45485_81	9403	Non-carrier	621	No
ERS12427094	45485_82	8911	Non-carrier	530	No
ERS12427103	45485_83	8887	Non-carrier	487	No
ERS12427111	45485_84	Positive Control	NA	NA	control
ERS12427128	45485_85	9194	Persistent	702	Yes
ERS12427120	45485_86	9533	Non-carrier	626	No
ERS12427135	45485_87	9226	Non-carrier	663	No
ERS12427146	45485_88	9254	Intermittent	693	Yes
ERS12427152	45485_89	9293	Persistent	666	Yes
ERS12427063	45485_90	9309	Persistent	667	Yes
ERS12427072	45485_91	9343	Non-carrier	718	No
ERS12427080	45485_92	9365	Intermittent	738	No
ERS12427088	45485_93	9407	Non-carrier	581	No
ERS12427096	45485_94	8910	Non-carrier	520	No
ERS12427104	45485_95	8885	Non-carrier	476	No
ERS12427112	45485_96	Negative Control	NA	NA	control
ERS1276650	45711_1	8765	Intermittent	262	Yes
ERS1276648	45711_2	8713	Non-carrier	292	No
ERS1276650	45711_3	8797	Intermittent	273	Yes
ERS1276651	45711_4	8841	Non-carrier	318	No
ERS1276642	45711_5	8864	Persistent	319	Yes
ERS1276643	45711_6	8946	Persistent	245	Yes
ERS1276643	45711_7	8971	Persistent	512	Yes
ERS1276644	45711_8	9008	Non-carrier	533	No
ERS1276645	45711_9	9028	Persistent	472	Yes
ERS1276646	45711_10	9062	Non-carrier	495	No
ERS1276646	45711_11	9094	Non-carrier	517	No
ERS1276647	45711_12	9107	NA	475	Yes
ERS1276649	45711_13	8769	Non-carrier	272	No
ERS1276648	45711_14	8714	Persistent	303	Yes
ERS1276650	45711_15	8798	Persistent	284	Yes
ERS1276651	45711_16	8842	Non-carrier	243	No
ERS1276642	45711_17	8867	Non-carrier	244	No
ERS1276643	45711_18	8956	Non-carrier	459	No
ERS1276643	45711_19	8982	Non-carrier	523	No
ERS1276644	45711_20	9014	Persistent	471	Yes
ERS1276645	45711_21	9033	Non-carrier	483	No
ERS1276646	45711_22	9064	Non-carrier	516	No
ERS1276647	45711_23	Negative Control	NA	NA	control
ERS1276647	45711_24	9108	Intermittent	486	No
ERS1276649	45711_25	8772	Intermittent	295	No
ERS1276648	45711_26	8708	Non-carrier	280	No
ERS1276650	45711_27	8801	Non-carrier	307	No
ERS1276641	45711_28	8845	Non-carrier	254	No
ERS1276642	45711_29	8868	NA	255	Yes
ERS1276643	45711_30	Negative Control	NA	NA	control
ERS1276644	45711_31	8983	Non-carrier	532	No
ERS1276644	45711_32	9043	Non-carrier	515	No
ERS1276645	45711_33	9015	Non-carrier	482	No
ERS1276646	45711_34	9065	Persistent	527	Yes
ERS1276647	45711_35	9107	NA	475	Yes
ERS1276648	45711_36	9109	Non-carrier	497	No
ERS1276649	45711_37	8775	Non-carrier	306	No
ERS1276648	45711_38	8705	Non-carrier	269	No
ERS1276650	45711_39	8816	Non-carrier	253	No
ERS1276641	45711_40	8848	Non-carrier	265	No
ERS1276642	45711_41	8872	Intermittent	275	Yes
ERS1276643	45711_42	8956	Non-carrier	459	No
ERS1276644	45711_43	8991	Intermittent	470	No
ERS1276644	45711_44	9016	Persistent	493	Yes
ERS1276645	45711_45	9048	NA	526	No
ERS1276646	45711_46	9067	Non-carrier	535	No
ERS1276647	45711_47	9108	Intermittent	486	No
ERS1276648	45711_48	9110	Persistent	507	Yes
ERS1276649	45711_49	8778	Persistent	316	Yes
ERS1276649	45711_50	8752	Persistent	305	Yes
ERS1276650	45711_51	8818	Persistent	264	Yes
ERS1276641	45711_52	8849	NA	274	Yes
ERS1276642	45711_53	8931	Non-carrier	458	No
ERS1276643	45711_54	8959	Intermittent	469	Yes
ERS1276644	45711_55	8994	Non-carrier	492	No
ERS1276645	45711_56	9019	Intermittent	503	No
ERS1276645	45711_57	9050	Non-carrier	534	No
ERS1276646	45711_58	9076	Non-carrier	464	No
ERS1276647	45711_59	9109	Non-carrier	497	No
ERS1276648	45711_60	9015	Non-carrier	482	No
ERS1276649	45711_61	8779	Non-carrier	241	No
ERS1276649	45711_62	8754	Non-carrier	315	No
ERS1276650	45711_63	Negative Control	NA	NA	control
ERS1276641	45711_64	8851	Non-carrier	286	No
ERS1276642	45711_65	8933	Non-carrier	468	No
ERS1276643	45711_66	8961	NA	480	No
ERS1276644	45711_67	8995	Persistent	502	Yes
ERS1276645	45711_68	9022	Persistent	514	Yes
ERS1276646	45711_69	9052	Non-carrier	463	No
ERS1276647	45711_70	9078	Persistent	474	Yes
ERS1276647	45711_71	9110	Persistent	507	Yes
ERS1276648	45711_72	9043	Non-carrier	515	No
ERS1276650	45711_73	8792	Intermittent	252	No
ERS1276649	45711_74	8759	Non-carrier	240	No
ERS1276650	45711_75	8825	Non-carrier	285	No
ERS1276642	45711_76	8856	Non-carrier	298	No
ERS1276642	45711_77	8934	NA	479	No
ERS1276643	45711_78	8967	Persistent	491	Yes
ERS1276644	45711_79	9003	Persistent	513	Yes
ERS1276645	45711_80	9025	Non-carrier	525	No
ERS1276645	45711_81	9056	Persistent	473	Yes
ERS1276646	45711_82	9090	Non-carrier	485	No
ERS1276647	45711_83	9111	Persistent	518	Yes
ERS1276648	45711_84	Positive Control	NA	NA	control
ERS1276649	45711_85	8794	Non-carrier	263	No
ERS1276649	45711_86	8761	Persistent	251	Yes
ERS1276650	45711_87	8826	Non-carrier	297	No
ERS1276642	45711_88	8863	Persistent	309	Yes
ERS1276642	45711_89	8935	Persistent	490	Yes
ERS1276643	45711_90	8968	Non-carrier	501	No
ERS1276644	45711_91	9005	Persistent	524	Yes
ERS1276645	45711_92	Negative Control	NA	NA	control
ERS1276646	45711_93	9059	Persistent	484	Yes
ERS1276646	45711_94	9091	Non-carrier	496	No
ERS1276647	45711_95	9142	Non-carrier	660	No
ERS1276648	45711_96	Negative Control	NA	NA	control
ERS1275530	45724_1	10617	Non-carrier	760	No
ERS1275529	45724_2	10615	Non-carrier	761	No
ERS1275531	45724_3	10622	Non-carrier	762	No
ERS1275532	45724_4	10625	Non-carrier	763	No
ERS1275523	45724_5	10627	Non-carrier	764	No
ERS1275524	45724_6	10628	Non-carrier	765	No
ERS1275525	45724_7	10633	Non-carrier	766	No
ERS1275525	45724_8	10635	Intermittent	767	Yes
ERS1275526	45724_9	10637	Persistent	768	Yes
ERS1275527	45724_10	10638	Non-carrier	769	No
ERS1275528	45724_11	10639	Persistent	770	Yes
ERS1275529	45724_12	10640	Persistent	771	Yes
ERS1275530	45724_13	10642	Intermittent	772	No
ERS1275529	45724_14	10641	Non-carrier	773	No
ERS1275531	45724_15	10643	Non-carrier	774	No
ERS1275532	45724_16	10645	Persistent	775	Yes
ERS1275523	45724_17	10648	Non-carrier	776	No
ERS1275524	45724_18	Negative Control	NA	NA	control
ERS1275524	45724_19	10652	Non-carrier	777	No
ERS1275525	45724_20	10655	Persistent	778	Yes
ERS1275526	45724_21	10656	Persistent	779	Yes
ERS1275527	45724_22	10662	Non-carrier	780	No
ERS1275528	45724_23	10665	Non-carrier	781	No
ERS1275529	45724_24	10675	Non-carrier	782	No
ERS1275530	45724_25	10683	Non-carrier	783	No
ERS1275529	45724_26	10679	Persistent	784	Yes
ERS1275531	45724_27	10685	Non-carrier	785	No
ERS1275532	45724_28	10686	Persistent	786	Yes
ERS1275523	45724_29	10697	Persistent	787	Yes
ERS1275524	45724_30	Negative Control	NA	NA	control
ERS1275525	45724_31	10701	Intermittent	788	Yes
ERS1275525	45724_32	10706	Non-carrier	789	No
ERS1275526	45724_33	10707	NA	790	Yes
ERS1275527	45724_34	10710	Intermittent	791	No
ERS1275528	45724_35	10720	Non-carrier	792	No
ERS1275528	45724_36	10731	Non-carrier	793	No
ERS1275530	45724_37	10725	Persistent	794	Yes
ERS1275530	45724_38	10722	Non-carrier	795	No
ERS1275531	45724_39	10728	Non-carrier	796	No
ERS1275523	45724_40	10729	Persistent	797	Yes
ERS1275523	45724_41	10731	Non-carrier	793	No
ERS1275524	45724_42	10733	Persistent	798	Yes
ERS1275525	45724_43	10735	NA	799	No
ERS1275526	45724_44	10736	Non-carrier	800	No
ERS1275526	45724_45	10737	Non-carrier	801	No
ERS1275527	45724_46	10740	Non-carrier	802	No
ERS1275528	45724_47	10741	Persistent	803	Yes
ERS1275529	45724_48	10733	Persistent	798	Yes
ERS1275530	45724_49	10746	Non-carrier	804	No
ERS1275530	45724_50	10744	Intermittent	805	Yes
ERS1275531	45724_51	10747	Non-carrier	806	No
ERS1275522	45724_52	10748	Intermittent	807	No
ERS1275523	45724_53	10749	Non-carrier	808	No
ERS1275524	45724_54	10752	Non-carrier	809	No
ERS1275525	45724_55	10755	Intermittent	810	No
ERS1275526	45724_56	10756	Persistent	811	Yes
ERS1275526	45724_57	10757	Non-carrier	812	No
ERS1275527	45724_58	10760	Intermittent	813	No
ERS1275528	45724_59	10765	Persistent	814	Yes
ERS1275529	45724_60	10735	NA	799	No
ERS1275531	45724_61	10768	Non-carrier	815	No
ERS1275530	45724_62	10767	Persistent	816	Yes
ERS1275531	45724_63	10769	Non-carrier	817	No
ERS1275522	45724_64	10770	Non-carrier	818	No
ERS1275523	45724_65	10772	Non-carrier	819	No
ERS1275524	45724_66	10773	Persistent	820	Yes
ERS1275525	45724_67	10774	Non-carrier	821	No
ERS1275526	45724_68	10775	Intermittent	822	Yes
ERS1275527	45724_69	Negative Control	NA	NA	control
ERS1275528	45724_70	10778	Persistent	823	Yes
ERS1275528	45724_71	10780	Persistent	824	Yes
ERS1275529	45724_72	10736	Non-carrier	800	No
ERS1275531	45724_73	10785	NA	825	No
ERS1275530	45724_74	10781	Persistent	826	Yes
ERS1275531	45724_75	10789	Persistent	827	Yes
ERS1275523	45724_76	10792	Non-carrier	828	No
ERS1275523	45724_77	10795	Persistent	829	Yes
ERS1275524	45724_78	10797	Non-carrier	830	No
ERS1275525	45724_79	10798	Persistent	831	Yes
ERS1275526	45724_80	10799	Non-carrier	832	No
ERS1275527	45724_81	10801	Non-carrier	833	No
ERS1275527	45724_82	Negative Control	NA	NA	control
ERS1275528	45724_83	10802	Intermittent	834	No
ERS1275529	45724_84	10737	Non-carrier	801	No
ERS1275531	45724_85	10805	Non-carrier	835	No
ERS1275530	45724_86	10804	NA	836	No
ERS1275532	45724_87	10806	Non-carrier	837	No
ERS1275523	45724_88	10807	Persistent	838	Yes
ERS1275524	45724_89	10808	Non-carrier	839	No
ERS1275524	45724_90	10814	Persistent	840	Yes
ERS1275525	45724_91	10815	Non-carrier	841	No
ERS1275526	45724_92	10817	Non-carrier	842	No
ERS1275527	45724_93	10818	Non-carrier	843	No
ERS1275527	45724_94	10822	Non-carrier	844	No
ERS1275528	45724_95	Negative Control	NA	NA	control
ERS1275529	45724_96	Negative Control	NA	NA	control
ERS1279736	45742_1	9852	Persistent	845	Yes
ERS1279736	45742_2	9855	Persistent	846	Yes
ERS1279737	45742_3	9856	Intermittent	847	No
ERS1279738	45742_4	9863	Non-carrier	848	No
ERS1279739	45742_5	9867	Intermittent	849	Yes
ERS1279740	45742_6	9870	NA	850	Yes
ERS1279740	45742_7	9877	Non-carrier	851	No
ERS1279741	45742_8	9881	Non-carrier	852	No
ERS1279742	45742_9	9883	Intermittent	853	Yes
ERS1279743	45742_10	9900	NA	854	No
ERS1279744	45742_11	9908	Non-carrier	855	No
ERS1279744	45742_12	Negative Control	NA	NA	control
ERS1279736	45742_13	9911	Non-carrier	856	No
ERS1279737	45742_14	9915	Persistent	857	Yes
ERS1279737	45742_15	9916	Persistent	858	Yes
ERS1279738	45742_16	9918	Persistent	859	Yes
ERS1279739	45742_17	9924	Non-carrier	860	No
ERS1279740	45742_18	9926	Non-carrier	861	No
ERS1279741	45742_19	9927	Non-carrier	862	No
ERS1279742	45742_20	9932	Intermittent	863	No
ERS1279742	45742_21	9943	Persistent	864	Yes
ERS1279743	45742_22	9983	Non-carrier	865	No
ERS1279744	45742_23	9984	Persistent	866	Yes
ERS1279745	45742_24	Negative Control	NA	NA	control
ERS1279736	45742_25	9988	Non-carrier	867	No
ERS1279737	45742_26	9997	Persistent	868	Yes
ERS1279738	45742_27	10113	Non-carrier	869	No
ERS1279738	45742_28	10426	Non-carrier	870	No
ERS1279739	45742_29	10446	Non-carrier	871	No
ERS1279740	45742_30	10468	NA	872	No
ERS1279741	45742_31	10469	Non-carrier	873	No
ERS1279741	45742_32	10470	Persistent	874	Yes
ERS1279742	45742_33	10476	Persistent	875	Yes
ERS1279743	45742_34	10478	Non-carrier	876	No
ERS1279744	45742_35	10479	Intermittent	877	Yes
ERS1279745	45742_36	10446	Non-carrier	871	No
ERS1279736	45742_37	Negative Control	NA	NA	control
ERS1279737	45742_38	10483	Non-carrier	878	No
ERS1279739	45742_39	10484	Persistent	879	Yes
ERS1279738	45742_40	10491	Intermittent	880	Yes
ERS1279739	45742_41	10493	Non-carrier	881	No
ERS1279740	45742_42	10497	Non-carrier	882	No
ERS1279741	45742_43	10501	Persistent	883	Yes
ERS1279741	45742_44	10506	Non-carrier	884	No
ERS1279742	45742_45	10509	Non-carrier	885	No
ERS1279743	45742_46	10511	Persistent	886	Yes
ERS1279744	45742_47	10514	NA	887	No
ERS1279745	45742_48	10468	NA	872	No
ERS1279736	45742_49	10515	Persistent	888	Yes
ERS1279737	45742_50	Negative Control	NA	NA	control
ERS1279737	45742_51	10518	Non-carrier	889	No
ERS1279738	45742_52	10525	Non-carrier	890	No
ERS1279739	45742_53	10529	Non-carrier	891	No
ERS1279740	45742_54	10530	Persistent	892	Yes
ERS1279741	45742_55	10534	Intermittent	893	Yes
ERS1279742	45742_56	10535	Persistent	894	Yes
ERS1279743	45742_57	10536	Persistent	895	Yes
ERS1279743	45742_58	10539	Non-carrier	896	No
ERS1279744	45742_59	10544	Persistent	897	Yes
ERS1279745	45742_60	10469	Non-carrier	873	No
ERS1279736	45742_61	10545	Non-carrier	898	No
ERS1279737	45742_62	10547	Non-carrier	899	No
ERS1279738	45742_63	10552	Non-carrier	900	No
ERS1279738	45742_64	10553	Non-carrier	901	No
ERS1279739	45742_65	10555	NA	902	No
ERS1279740	45742_66	10556	Non-carrier	903	No
ERS1279741	45742_67	10558	Persistent	904	Yes
ERS1279742	45742_68	10560	Non-carrier	905	No
ERS1279742	45742_69	10562	Persistent	906	Yes
ERS1279743	45742_70	10564	Non-carrier	907	No
ERS1279744	45742_71	10567	Persistent	908	Yes
ERS1279745	45742_72	10470	Persistent	874	Yes
ERS1279736	45742_73	10568	Non-carrier	909	No
ERS1279737	45742_74	10570	Intermittent	910	No
ERS1279738	45742_75	10572	Persistent	911	Yes
ERS1279739	45742_76	10576	Intermittent	912	Yes
ERS1279739	45742_77	10579	Non-carrier	913	No
ERS1279740	45742_78	10584	Non-carrier	914	No
ERS1279741	45742_79	10586	Non-carrier	915	No
ERS1279742	45742_80	10587	NA	916	No
ERS1279743	45742_81	10588	Intermittent	917	Yes
ERS1279743	45742_82	10591	Non-carrier	918	No
ERS1279744	45742_83	10592	Non-carrier	919	No
ERS1279745	45742_84	Positive Control	NA	NA	control
ERS1279736	45742_85	10593	Non-carrier	920	No
ERS1279737	45742_86	10598	Non-carrier	921	No
ERS1279738	45742_87	10602	Non-carrier	922	No
ERS1279739	45742_88	10603	Intermittent	923	No
ERS1279740	45742_89	10606	Non-carrier	924	No
ERS1279740	45742_90	10608	Persistent	925	Yes
ERS1279741	45742_91	10609	Persistent	926	Yes
ERS1279742	45742_92	10610	Non-carrier	927	No
ERS1279743	45742_93	10611	Non-carrier	928	No
ERS1279744	45742_94	10612	Non-carrier	929	No
ERS1279744	45742_95	10614	NA	930	No
ERS1279745	45742_96	Negative Control	NA	NA	control
ERS1276632	45747_1	8719	Non-carrier	238	No
ERS1276631	45747_2	10241	Persistent	548	Yes
ERS1276632	45747_3	9627	NA	658	No
ERS1276634	45747_4	9589	Intermittent	588	No
ERS1276634	45747_5	9553	Non-carrier	627	No
ERS1276635	45747_6	11340	Non-carrier	574	No
ERS1276636	45747_7	10406	Non-carrier	580	No
ERS1276636	45747_8	Negative Control	NA	NA	control
ERS1276639	45747_9	9575	Non-carrier	501	No
ERS1276638	45747_10	9425	Persistent	640	Yes
ERS1276639	45747_11	9468	Persistent	603	Yes
ERS1276640	45747_12	Negative Control	NA	NA	control
ERS1276632	45747_13	8724	Intermittent	260	Yes
ERS1276631	45747_14	8742	Persistent	239	Yes
ERS1276632	45747_15	9631	Persistent	590	Yes
ERS1276633	45747_16	9596	Intermittent	607	No
ERS1276634	45747_17	9561	Intermittent	655	No
ERS1276635	45747_18	11169	Non-carrier	575	No
ERS1276636	45747_19	9945	Intermittent	555	Yes
ERS1276636	45747_20	10378	Non-carrier	576	No
ERS1276637	45747_21	9721	Non-carrier	497	No
ERS1276638	45747_22	9427	NA	649	No
ERS1276639	45747_23	9479	Non-carrier	576	No
ERS1276640	45747_24	9452	Non-carrier	634	No
ERS1276632	45747_25	8727	Intermittent	270	No
ERS1276631	45747_26	8743	Non-carrier	250	No
ERS1276633	45747_27	9632	Non-carrier	599	No
ERS1276633	45747_28	9585	Non-carrier	646	No
ERS1276634	45747_29	9551	Non-carrier	616	No
ERS1276635	45747_30	10981	Non-carrier	552	No
ERS1276636	45747_31	9946	Non-carrier	565	No
ERS1276637	45747_32	10219	Intermittent	540	Yes
ERS1276637	45747_33	9736	Non-carrier	467	No
ERS1276638	45747_34	9437	Non-carrier	592	No
ERS1276639	45747_35	9480	Persistent	233	Yes
ERS1276640	45747_36	10241	Persistent	548	Yes
ERS1276632	45747_37	8728	Non-carrier	281	No
ERS1276631	45747_38	8746	Non-carrier	271	No
ERS1276633	45747_39	9609	Non-carrier	647	No
ERS1276633	45747_40	9588	Non-carrier	656	No
ERS1276634	45747_41	9549	Persistent	605	Yes
ERS1276635	45747_42	10811	Non-carrier	539	No
ERS1276636	45747_43	9949	Persistent	569	Yes
ERS1276637	45747_44	10012	Persistent	554	Yes
ERS1276637	45747_45	9764	Persistent	484	Yes
ERS1276638	45747_46	9447	Intermittent	602	Yes
ERS1276639	45747_47	9482	Persistent	652	Yes
ERS1276640	45747_48	8946	Persistent	245	Yes
ERS1276632	45747_49	9481	Persistent	553	Yes
ERS1276631	45747_50	8747	Non-carrier	282	No
ERS1276633	45747_51	9611	Persistent	657	Yes
ERS1276633	45747_52	9572	NA	628	No
ERS1276634	45747_53	9546	Non-carrier	586	No
ERS1276635	45747_54	9982	Intermittent	540	No
ERS1276636	45747_55	10605	Persistent	563	Yes
ERS1276637	45747_56	10145	Persistent	577	Yes
ERS1276637	45747_57	9784	Intermittent	579	Yes
ERS1276638	45747_58	9451	Non-carrier	622	No
ERS1276639	45747_59	9486	Intermittent	594	No
ERS1276640	45747_60	9502	Persistent	577	Yes
ERS1276632	45747_61	10158	Persistent	560	Yes
ERS1276631	45747_62	8732	Intermittent	293	No
ERS1276633	45747_63	9615	Non-carrier	589	No
ERS1276634	45747_64	9583	Non-carrier	638	No
ERS1276634	45747_65	11009	Non-carrier	559	No
ERS1276635	45747_66	9956	Non-carrier	538	No
ERS1276636	45747_67	10621	Non-carrier	931	No
ERS1276637	45747_68	10141	Intermittent	578	Yes
ERS1276638	45747_69	9844	Non-carrier	489	No
ERS1276638	45747_70	9502	Persistent	577	Yes
ERS1276639	45747_71	9492	NA	613	No
ERS1276640	45747_72	9452	Non-carrier	634	No
ERS1276632	45747_73	10361	Non-carrier	568	No
ERS1276631	45747_74	8739	Non-carrier	314	No
ERS1276633	45747_75	9617	Non-carrier	598	No
ERS1276634	45747_76	8570	NA	435	No
ERS1276635	45747_77	11327	Non-carrier	559	No
ERS1276635	45747_78	10269	Non-carrier	564	No
ERS1276636	45747_79	9909	Persistent	550	Yes
ERS1276637	45747_80	10207	Persistent	563	Yes
ERS1276638	45747_81	10117	Persistent	543	Yes
ERS1276638	45747_82	9463	Non-carrier	641	No
ERS1276639	45747_83	9499	Persistent	635	Yes
ERS1276640	45747_84	Positive Control	NA	NA	control
ERS1276632	45747_85	9620	Non-carrier	618	No
ERS1276631	45747_86	Negative Control	NA	NA	control
ERS1276633	45747_87	9596	Intermittent	607	No
ERS1276634	45747_88	8566	Persistent	396	Yes
ERS1276635	45747_89	11253	Non-carrier	539	No
ERS1276635	45747_90	10590	Intermittent	555	No
ERS1276636	45747_91	10503	Non-carrier	564	No
ERS1276637	45747_92	10389	Non-carrier	552	No
ERS1276638	45747_93	10467	Persistent	543	Yes
ERS1276639	45747_94	9467	NA	593	Yes
ERS1276639	45747_95	9501	Non-carrier	642	No
ERS1276640	45747_96	Negative Control	NA	NA	control
ERS1437235	46538_1	10843	Persistent	932	Yes
ERS1437234	46538_2	10824	Persistent	933	Yes
ERS1437236	46538_3	10860	Intermittent	934	No
ERS1437237	46538_4	10884	Persistent	935	Yes
ERS1437238	46538_6	10941	Intermittent	936	Yes
ERS1437239	46538_7	10956	Intermittent	937	Yes
ERS1437240	46538_8	10983	Non-carrier	938	No
ERS1437241	46538_9	11010	Persistent	939	Yes
ERS1437241	46538_10	11036	Persistent	940	Yes
ERS1437242	46538_11	11080	Non-carrier	941	No
ERS1437243	46538_12	11103	Non-carrier	942	No
ERS1437235	46538_13	10845	Non-carrier	943	No
ERS1437234	46538_14	10826	Intermittent	944	Yes
ERS1437236	46538_15	10866	Persistent	945	Yes
ERS1437237	46538_16	10889	NA	946	No
ERS1437238	46538_17	10912	Persistent	947	Yes
ERS1437239	46538_18	10942	Non-carrier	948	No
ERS1437239	46538_19	10963	NA	949	Yes
ERS1437240	46538_20	10985	Non-carrier	950	No
ERS1437241	46538_21	11014	Non-carrier	951	No
ERS1437242	46538_22	11044	Intermittent	952	No
ERS1437242	46538_23	11081	Non-carrier	953	No
ERS1437243	46538_24	11105	Non-carrier	954	No
ERS1437235	46538_25	10848	Intermittent	955	Yes
ERS1437234	46538_26	10828	Non-carrier	956	No
ERS1437236	46538_27	10867	Intermittent	957	Yes
ERS1437237	46538_28	10892	Persistent	958	Yes
ERS1437238	46538_29	10914	Non-carrier	959	No
ERS1437238	46538_30	10943	Persistent	960	Yes
ERS1437239	46538_31	10971	Non-carrier	961	No
ERS1437240	46538_32	10986	Intermittent	962	No
ERS1437241	46538_33	11015	Non-carrier	963	No
ERS1437242	46538_34	11045	Non-carrier	964	No
ERS1437242	46538_35	11082	Persistent	965	Yes
ERS1437243	46538_36	10889	NA	946	No
ERS1437235	46538_37	Negative Control	NA	NA	control
ERS1437235	46538_38	10832	Non-carrier	966	No
ERS1437236	46538_39	10868	Non-carrier	967	No
ERS1437237	46538_40	10893	Persistent	968	Yes
ERS1437238	46538_41	Negative Control	NA	NA	control
ERS1437238	46538_42	10947	Non-carrier	969	No
ERS1437239	46538_43	10974	Persistent	970	Yes
ERS1437240	46538_44	10992	Persistent	971	Yes
ERS1437241	46538_45	11024	Non-carrier	972	No
ERS1437242	46538_46	11046	Non-carrier	973	No
ERS1437242	46538_47	Negative Control	NA	NA	control
ERS1437243	46538_48	10892	Persistent	958	Yes
ERS1437235	46538_49	10850	Persistent	974	Yes
ERS1437235	46538_50	10833	Non-carrier	975	No
ERS1437236	46538_51	10871	Non-carrier	976	No
ERS1437237	46538_52	10897	Non-carrier	977	No
ERS1437238	46538_53	10918	Persistent	978	Yes
ERS1437239	46538_54	10949	Intermittent	979	No
ERS1437239	46538_55	10977	Persistent	980	Yes
ERS1437240	46538_56	10994	Non-carrier	981	No
ERS1437241	46538_57	11032	Persistent	982	Yes
ERS1437242	46538_58	11066	Non-carrier	983	No
ERS1437243	46538_59	11084	Non-carrier	984	No
ERS1437243	46538_60	10893	Persistent	968	Yes
ERS1437236	46538_61	10852	Non-carrier	985	No
ERS1437235	46538_62	10839	Persistent	986	Yes
ERS1437236	46538_63	10873	Persistent	987	Yes
ERS1437237	46538_64	10898	Intermittent	988	Yes
ERS1437238	46538_65	10933	Persistent	989	Yes
ERS1437239	46538_66	10951	Non-carrier	990	No
ERS1437240	46538_67	10978	Persistent	991	Yes
ERS1437240	46538_68	10997	Persistent	992	Yes
ERS1437241	46538_69	11034	Non-carrier	993	No
ERS1437242	46538_70	11068	Persistent	994	Yes
ERS1437243	46538_71	11091	Persistent	995	Yes
ERS1437244	46538_72	10897	Non-carrier	977	No
ERS1437236	46538_73	10854	Non-carrier	996	No
ERS1437235	46538_74	10840	Non-carrier	997	No
ERS1437236	46538_75	10881	Non-carrier	998	No
ERS1437237	46538_76	10904	Non-carrier	999	No
ERS1437238	46538_77	10937	Persistent	1000	Yes
ERS1437239	46538_78	10954	Non-carrier	1001	No
ERS1437240	46538_79	10979	Non-carrier	1002	No
ERS1437241	46538_80	11001	Non-carrier	1003	No
ERS1437241	46538_81	11035	Non-carrier	1004	No
ERS1437242	46538_82	11069	Non-carrier	1005	No
ERS1437243	46538_83	11093	NA	1006	No
ERS1437244	46538_84	Positive Control	NA	NA	control
ERS1437236	46538_85	10859	Non-carrier	1007	No
ERS1437235	46538_86	10841	Non-carrier	1008	No
ERS1437237	46538_87	Negative Control	NA	NA	control
ERS1437237	46538_88	10908	Non-carrier	1009	No
ERS1437238	46538_89	10939	Non-carrier	1010	No
ERS1437239	46538_90	10955	Persistent	1011	Yes
ERS1437240	46538_91	10982	Persistent	1012	Yes
ERS1437240	46538_92	11006	Non-carrier	1013	No
ERS1437241	46538_93	Negative Control	NA	NA	control
ERS1437243	46538_94	11070	Non-carrier	1014	No
ERS1437243	46538_95	11095	Non-carrier	1015	No
ERS1437244	46538_96	Negative Control	NA	NA	control
ERS1437245	46599_1	11385	Non-carrier	1016	No
ERS1437244	46599_2	11366	Persistent	1017	Yes
ERS1437246	46599_3	11396	Persistent	1018	Yes
ERS1437246	46599_4	11415	NA	1019	Yes
ERS1437247	46599_5	11432	Non-carrier	1020	No
ERS1437248	46599_6	11442	NA	1021	No
ERS1437249	46599_7	11464	Persistent	1022	Yes
ERS1437249	46599_8	11488	Non-carrier	1023	No
ERS1437252	46599_9	11515	Non-carrier	1024	No
ERS1437253	46599_10	11532	Persistent	1025	Yes
ERS1437250	46599_11	11565	Intermittent	1026	Yes
ERS1437251	46599_12	Negative Control	NA	NA	control
ERS1437245	46599_13	11386	Persistent	1027	Yes
ERS1437244	46599_14	11367	Non-carrier	1028	No
ERS1437246	46599_15	11399	Intermittent	1029	Yes
ERS1437246	46599_16	11419	Intermittent	1030	Yes
ERS1437247	46599_17	11435	Persistent	1031	Yes
ERS1437248	46599_18	11446	Intermittent	1032	No
ERS1437249	46599_19	11468	Non-carrier	1033	No
ERS1437250	46599_20	11495	Non-carrier	1034	No
ERS1437252	46599_21	11516	Non-carrier	1035	No
ERS1437253	46599_22	11533	Persistent	1036	Yes
ERS1437250	46599_23	11566	Persistent	1037	Yes
ERS1437251	46599_24	11584	Non-carrier	1038	No
ERS1437245	46599_25	11387	Non-carrier	1039	No
ERS1437244	46599_26	11373	Persistent	1040	Yes
ERS1437245	46599_27	11401	Persistent	1041	Yes
ERS1437246	46599_28	11420	Non-carrier	1042	No
ERS1437247	46599_29	Negative Control	NA	NA	control
ERS1437248	46599_30	11448	NA	1043	No
ERS1437249	46599_31	11479	Non-carrier	1044	No
ERS1437250	46599_32	11499	Persistent	1045	Yes
ERS1437252	46599_33	11517	Intermittent	1046	Yes
ERS1437253	46599_34	11542	Non-carrier	1047	No
ERS1437251	46599_35	11569	Non-carrier	1048	No
ERS1437251	46599_36	11420	Non-carrier	1042	No
ERS1437245	46599_37	11388	Persistent	1049	Yes
ERS1437244	46599_38	11375	Non-carrier	1050	No
ERS1437246	46599_39	11405	Persistent	1051	Yes
ERS1437247	46599_40	11422	Persistent	1052	Yes
ERS1437247	46599_41	11436	Persistent	1053	Yes
ERS1437248	46599_42	Negative Control	NA	NA	control
ERS1437249	46599_43	11480	Non-carrier	1054	No
ERS1437250	46599_44	11504	Persistent	1055	Yes
ERS1437252	46599_45	Negative Control	NA	NA	control
ERS1437253	46599_46	11544	Intermittent	1056	Yes
ERS1437251	46599_47	11572	Intermittent	1057	Yes
ERS1437252	46599_48	11448	NA	1043	No
ERS1437245	46599_49	11390	Non-carrier	1058	No
ERS1437244	46599_50	11378	Non-carrier	1059	No
ERS1437246	46599_51	11406	Non-carrier	1060	No
ERS1437247	46599_52	11427	Non-carrier	1061	No
ERS1437247	46599_53	11437	Persistent	1062	Yes
ERS1437248	46599_54	11450	Persistent	1063	Yes
ERS1437249	46599_55	11483	Non-carrier	1064	No
ERS1437250	46599_56	11505	Intermittent	1065	No
ERS1437252	46599_57	11520	Non-carrier	1066	No
ERS1437253	46599_58	11553	Intermittent	1067	No
ERS1437251	46599_59	11573	Persistent	1068	Yes
ERS1437251	46599_60	11479	Non-carrier	1044	No
ERS1437245	46599_61	11391	Non-carrier	1069	No
ERS1437244	46599_62	11379	Persistent	1070	Yes
ERS1437246	46599_63	11408	Non-carrier	1071	No
ERS1437247	46599_64	11428	Non-carrier	1072	No
ERS1437248	46599_65	11438	Persistent	1073	Yes
ERS1437248	46599_66	11451	Persistent	1074	Yes
ERS1437249	46599_67	11485	NA	1075	Yes
ERS1437250	46599_68	11508	Persistent	1076	Yes
ERS1437253	46599_69	11521	Non-carrier	1077	No
ERS1437253	46599_70	11554	Non-carrier	1078	No
ERS1437251	46599_71	11577	Non-carrier	1079	No
ERS1437252	46599_72	11499	Persistent	1045	Yes
ERS1437245	46599_73	11392	Non-carrier	1080	No
ERS1437244	46599_74	11381	Intermittent	1081	Yes
ERS1437246	46599_75	Negative Control	NA	NA	control
ERS1437247	46599_76	11429	Persistent	1082	Yes
ERS1437248	46599_77	11439	Non-carrier	1083	No
ERS1437249	46599_78	11453	Persistent	1084	Yes
ERS1437249	46599_79	11487	Non-carrier	1085	No
ERS1437250	46599_80	11511	Persistent	1086	Yes
ERS1437253	46599_81	11523	Non-carrier	1087	No
ERS1437250	46599_82	11555	Non-carrier	1088	No
ERS1437251	46599_83	11578	Persistent	1089	Yes
ERS1437252	46599_84	Positive Control	NA	NA	control
ERS1437245	46599_85	11395	Intermittent	1090	Yes
ERS1437245	46599_86	Negative Control	NA	NA	control
ERS1437246	46599_87	11412	Persistent	1091	Yes
ERS1437247	46599_88	11430	Non-carrier	1092	No
ERS1437248	46599_89	11441	Intermittent	1093	Yes
ERS1437248	46599_90	11459	Persistent	1094	Yes
ERS1437249	46599_91	Negative Control	NA	NA	control
ERS1437252	46599_92	11514	NA	1095	Yes
ERS1437253	46599_93	11530	Intermittent	1096	No
ERS1437250	46599_94	11560	Non-carrier	1097	No
ERS1437251	46599_95	11581	Intermittent	1098	No
ERS1437252	46599_96	Negative Control	NA	NA	control
ERS1443309	46665_1	11147	Non-carrier	1099	No
ERS1443308	46665_2	11109	Non-carrier	1100	No
ERS1443310	46665_3	11170	Non-carrier	1101	No
ERS1443311	46665_4	11190	Non-carrier	1102	No
ERS1443312	46665_5	11209	Non-carrier	1103	No
ERS1443312	46665_6	11224	Non-carrier	1104	No
ERS1443313	46665_7	11255	Intermittent	1105	Yes
ERS1443314	46665_8	11277	Non-carrier	1106	No
ERS1443315	46665_9	11302	Persistent	1107	Yes
ERS1443316	46665_10	Negative Control	NA	NA	control
ERS1443316	46665_11	11345	Non-carrier	1108	No
ERS1443317	46665_12	11356	Persistent	1109	Yes
ERS1443309	46665_13	11148	Intermittent	1110	No
ERS1443308	46665_14	11125	Non-carrier	1111	No
ERS1443310	46665_15	Negative Control	NA	NA	control
ERS1443311	46665_16	11191	Non-carrier	1112	No
ERS1443312	46665_17	11210	Intermittent	1113	No
ERS1443312	46665_18	Negative Control	NA	NA	control
ERS1443313	46665_19	11261	Non-carrier	1114	No
ERS1443314	46665_20	11278	Non-carrier	1115	No
ERS1443315	46665_21	11307	Persistent	1116	Yes
ERS1443316	46665_22	11324	Non-carrier	1117	No
ERS1443316	46665_23	11348	Non-carrier	1118	No
ERS1443317	46665_24	11361	Non-carrier	1119	No
ERS1443309	46665_25	11149	Persistent	1120	Yes
ERS1443309	46665_26	11127	Non-carrier	1121	No
ERS1443310	46665_27	11174	Intermittent	1122	No
ERS1443311	46665_28	11194	Non-carrier	1123	No
ERS1443312	46665_29	11215	Non-carrier	1124	No
ERS1443313	46665_30	11225	Persistent	1125	Yes
ERS1443313	46665_31	Negative Control	NA	NA	control
ERS1443314	46665_32	11279	Non-carrier	1126	No
ERS1443315	46665_33	11309	Persistent	1127	Yes
ERS1443316	46665_34	11328	NA	1128	Yes
ERS1443317	46665_35	11350	Intermittent	1129	Yes
ERS1443317	46665_36	11225	Persistent	1125	Yes
ERS1443309	46665_37	11152	Persistent	1130	Yes
ERS1443309	46665_38	11128	Non-carrier	1131	No
ERS1443310	46665_39	11176	Non-carrier	1132	No
ERS1443311	46665_40	11195	Persistent	1133	Yes
ERS1443312	46665_41	11218	Non-carrier	1134	No
ERS1443313	46665_42	11227	Non-carrier	1135	No
ERS1443314	46665_43	11268	Persistent	1136	Yes
ERS1443314	46665_44	11284	Non-carrier	1137	No
ERS1443315	46665_45	11312	Non-carrier	1138	No
ERS1443316	46665_46	11332	Persistent	1139	Yes
ERS1443317	46665_47	11351	Intermittent	1140	Yes
ERS1443317	46665_48	11227	Non-carrier	1135	No
ERS1443310	46665_49	11153	Non-carrier	1141	No
ERS1443309	46665_50	11129	Non-carrier	1142	No
ERS1443310	46665_51	11183	Non-carrier	1143	No
ERS1443311	46665_52	11198	Non-carrier	1144	No
ERS1443312	46665_53	11219	Non-carrier	1145	No
ERS1443313	46665_54	11231	Persistent	1146	Yes
ERS1443313	46665_55	11272	Non-carrier	1147	No
ERS1443314	46665_56	11285	Persistent	1148	Yes
ERS1443315	46665_57	11316	Intermittent	1149	No
ERS1443316	46665_58	11335	Persistent	1150	Yes
ERS1443317	46665_59	11352	Non-carrier	1151	No
ERS1443318	46665_60	11231	Persistent	1146	Yes
ERS1443310	46665_61	11161	Non-carrier	1152	No
ERS1443309	46665_62	Negative Control	NA	NA	control
ERS1443310	46665_63	11186	Non-carrier	1153	No
ERS1443311	46665_64	Negative Control	NA	NA	control
ERS1443312	46665_65	11221	Non-carrier	1154	No
ERS1443313	46665_66	11247	Non-carrier	1155	No
ERS1443314	46665_67	11273	Non-carrier	1156	No
ERS1443315	46665_68	11291	Intermittent	1157	Yes
ERS1443315	46665_69	11317	Intermittent	1158	Yes
ERS1443316	46665_70	11336	Persistent	1159	Yes
ERS1443317	46665_71	Negative Control	NA	NA	control
ERS1443318	46665_72	11247	Non-carrier	1155	No
ERS1443310	46665_73	11164	Persistent	1160	Yes
ERS1443309	46665_74	11133	Persistent	1161	Yes
ERS1443311	46665_75	11188	Non-carrier	1162	No
ERS1443311	46665_76	11200	Intermittent	1163	Yes
ERS1443312	46665_77	11222	Non-carrier	1164	No
ERS1443313	46665_78	11250	Persistent	1165	Yes
ERS1443314	46665_79	11275	Non-carrier	1166	No
ERS1443314	46665_80	Negative Control	NA	NA	control
ERS1443315	46665_81	11319	Non-carrier	1167	No
ERS1443316	46665_82	11338	Non-carrier	1168	No
ERS1443317	46665_83	11353	Persistent	1169	Yes
ERS1443318	46665_84	Positive Control	NA	NA	control
ERS1443310	46665_85	11167	Non-carrier	1170	No
ERS1443309	46665_86	11144	Intermittent	1171	No
ERS1443311	46665_87	11189	Non-carrier	1172	No
ERS1443311	46665_88	11204	Intermittent	1173	Yes
ERS14433127	46665_89	11223	Non-carrier	1174	No
ERS14433134	46665_90	11251	Non-carrier	1175	No
ERS14433143	46665_91	11276	Non-carrier	1176	No
ERS14433151	46665_92	11292	Non-carrier	1177	No
ERS14433159	46665_93	11321	Intermittent	1178	No
ERS14433166	46665_94	11343	Non-carrier	1179	No
ERS14433175	46665_95	11355	Non-carrier	1180	No
ERS14433183	46665_96	Negative Control	NA	NA	control
