# Supplementary material for: The nasal microbiome redefines Staphylococcus aureus colonisation
Source: Research Square preprint supplement (doi:10.21203/rs.3.rs-6079410/v1), 2025-04-29
Supplement: Supplementary file 3 [file d8fb280fdad758c1be6aae64.xlsx]

## Sheet: Sheet2
Table S7: Metadata and ENA accessions for S. aureus isolates.
Sample #	WGS_id	ST	ENA	CARRIAGE_status	Matching_16S_sample_ID
1	231754wE11_6703A	30	ERS22972376	Persistent	25545_14
2	231754wG11_6707A	NA	ERS22972378	Intermittent	25545_50
3	231755wC3_6843A	30	ERS22972401	Persistent	25662_26
4	231755wA5_6950A	1	ERS22972414	Intermittent	25662_29
5	231755wG4_6946A	5	ERS22972412	Persistent	25662_30
6	231755wE4_6936A	5	ERS22972411	Persistent	25662_31
7	231755wG3_6891A	508	ERS22972406	Persistent	25662_34
8	231755wC4_6933A	123	ERS22972409	Persistent	25662_43
9	231755wB5_6954A	15	ERS22972416	Persistent	25662_65
10	231755wB4_6926A	30	ERS22972407	Intermittent	25662_91
11	231755wH3_6908A	45	ERS22972408	Persistent	25662_94
12	231755wF7_8066A	30	ERS22973007	NA	26071_1
13	38088_2#45	30	ERS6226722	NA	26071_11
14	231755wE7_8057A	8	ERS22973004	Persistent	26071_15
15	231755wD7_8036A	182	ERS22972998	Persistent	26071_17
16	231755wC6_8046A	39	ERS22973001	Persistent	26071_28
17	231755wF6_8058A	8	ERS22973005	Persistent	26071_3
18	231755wH5_8026A	15	ERS22972996	Intermittent	26071_30
19	231755wH6_8063A	30	ERS22973006	Persistent	26071_37
20	231755wE6_8053A	NA	ERS22973003	Persistent	26071_39
21	231755wA7_6990A	5	ERS22972417	Intermittent	26071_45
22	231755wG7_8072A	2990	ERS22973008	Intermittent	26071_50
23	231755wB6_8041A	8	ERS22973000	NA	26071_52
24	231755wF5_8011A	5	ERS22972420	Persistent	26071_55
25	231755wC5_6989A	5	ERS22972415	Intermittent	26071_57
26	231755wH1_6767A	34	ERS22972392	Intermittent	26071_58
27	231755wB3_6819A	NA	ERS22972399	Persistent	26071_60
28	231755wF4_6886A	34	ERS22972405	Persistent	26071_69
29	231755wD6_8050A	30	ERS22973002	Persistent	26071_75
30	38088_2#47	39	ERS6226726	Persistent	26071_76
31	231755wA6_8031A	34	ERS22972999	Persistent	26071_77
32	231755wD5_6995A	39	ERS22972418	Intermittent	26071_80
33	231755wH2_6811A	30	ERS22972398	NA	26071_82
34	231755wC7_8030A	34	ERS22972997	NA	26071_89
35	231755wG5_8019A	5	ERS22972945	NA	26071_90
36	231755wE5_8005A	22	ERS22972419	NA	26071_91
37	231755wE1_6751A	5	ERS22972389	Persistent	26081_24
38	231754wB12_6712A	582	ERS22972381	Intermittent	26081_27
39	231754wB11_6695A	30	ERS22972373	Intermittent	26081_29
40	231754wA11_6692A	5	ERS22972372	Intermittent	26081_32
41	231754wH9_6668A	46	ERS22972363	Intermittent	26081_34
42	231754wC11_6699A	15	ERS22972374	Persistent	26081_38
43	231754wH10_6691A	5	ERS22972371	Intermittent	26081_43
44	231754wD11_6701A	30	ERS22972375	Intermittent	26081_55
45	231754wH11_6708A	22	ERS22972379	Intermittent	26081_63
46	231755wG1_6759A	7	ERS22972391	Persistent	26081_95
47	231755wH7_8076A	30	ERS22973009	Persistent	27188_31
48	231755wF1_6752A	8	ERS22972390t_found	Persistent	27188_6
49	231755wE8_8114A	8	ERS22973014	Intermittent	27188_66
50	231755wF8_8115A	5	ERS22973015	Persistent	27188_67
51	231755wC9_8118A	30	ERS22973017	Persistent	27188_70
52	231755wH8_8127A	39	ERS22973018	Persistent	27188_77
53	231755wA9_8148A	30	ERS22973020	NA	27188_91
54	231755wB9_8149A	5	ERS22973022	Persistent	27188_92
55	231764wD6_8652A	5	ERS22972959	Persistent	27462_1
56	231764wD7_8685A	672	ERS22972965	Persistent	27462_28
57	38214_1#202	398	ERS6226744	Persistent	27462_31
58	231764wC7_8683A	12	ERS22972964	Intermittent	27462_4
59	231764wF6_8663A	NA	ERS22972960	NA	27462_49
60	231764wC9_8771A	22	ERS22972975	Persistent	27462_56
61	231764wA7_8680A	30	ERS22972962	NA	27462_63
62	231764wH8_8749A	123	ERS22972970	Persistent	27462_67
63	231764wG8_8742A	7	ERS22972969	Persistent	27462_7
64	231764wC6_8644A	45	ERS22972958	Persistent	27462_74
65	38214_1#200	30	ERS6226742	Intermittent	27462_76
66	231764wE10_8827A	30	ERS22972982	Persistent	27462_82
67	231764wG6_8667A	8	ERS22972961	Persistent	27462_85
68	231764wB7_8682A	45	ERS22972963	Persistent	27462_87
69	231764wD9_8778A	508	ERS22972974	Persistent	27462_92
70	231764wC2_8455A	582	ERS22973054	Persistent	27464_16
71	231764wF5_8611A	30	ERS22972954	Intermittent	27464_20
72	231764wA4_8529A	15	ERS22972948	Persistent	27464_23
73	231764wF2_8485A	97	ERS22973058	Intermittent	27464_31
74	231764wB4_8542A	54	ERS22972949	Persistent	27464_36
75	231764wD2_8465A	22	ERS22973056	Intermittent	27464_5
76	231764wA2_8449A	34	ERS22973053	Persistent	27464_51
77	38088_2#71	30	ERS6226738	Intermittent	27464_64
78	231764wA5_8593A	45	ERS22972953	Persistent	27464_90
79	231764wG5_8623A	5	ERS22972956	Persistent	27464_93
80	231764wA1_8405A	8	ERS22973047	Persistent	27495_23
81	231764wB1_8406A	30	ERS22973046	NA	27495_35
82	231755wA12_8317A	582	ERS22973048	Intermittent	27495_49
83	231755wD12_8378A	5	ERS22973043	Persistent	27495_56
84	231755wB12_8360A	5	ERS22973042	Persistent	27495_78
85	231755wC12_8370A	30	ERS22973044	Persistent	27495_79
86	231755wD10_8206a	97	ERS22973031	Intermittent	27497_17
87	231755wC10_8198A	59	ERS22973030	Persistent	27497_28
88	231755wE9_8166A	5	ERS22973024	Persistent	27497_37
89	231755wB10_8194A	8	ERS22973028	Intermittent	27497_4
90	231755wG10_8222A	97	ERS22973033	Intermittent	27497_42
91	231755wC11_8272A	45	ERS22973037	Persistent	27497_58
92	231755wD9_8161A	15	ERS22973023	NA	27497_62
93	231755wH10_8225A	45	ERS22973032	Persistent	27497_66
94	231755wD11_8273A	5	ERS22973038	Persistent	27497_70
95	231765wD2_9059A	5	ERS22973080	Persistent	27673_33
96	231764wE12_8971A	30	ERS22973068	Persistent	27673_65
97	231765wG9_9481A	508	ERS22973135	Persistent	32623_39
98	231765wA12_9631A	45	ERS22973175	Persistent	33430_12
99	231765wG8_9408A	45	ERS22973125	Persistent	33430_13
100	231765wA11_9467A	630	ERS22973131	NA	33430_16
101	231765wC9_9436A	NA	ERS22973130	Persistent	33430_3
102	231765wF10_9527A	6	ERS22973151	Persistent	33430_31
103	231765wH10_9549A	121	ERS22973156	Persistent	33430_32
104	231765wA9_9419A	72	ERS22973126	Persistent	33430_37
105	231765wA10_9483A	1	ERS22973137	Intermittent	33430_5
106	38088_2#105	7	ERS6226775	Persistent	33430_58
107	231765wF11_9621A	1027	ERS22973165	Persistent	33430_59
108	231765wB9_9425A	5	ERS22973128	Persistent	33430_73
109	231765wF8_9405A	123	ERS22973124	Persistent	33430_74
110	231765wH11_9625A	8	ERS22973173	Persistent	33430_83
111	231765wG10_9544A	39	ERS22973154	Persistent	33430_91
112	231765wH3_9167A	8	ERS22973090	Persistent	33433_1
113	231765wD7_9333A	398	ERS22973113	Persistent	33433_10
114	231765wB8_9379A	5	ERS22973120	Persistent	33433_11
115	231765wA4_9171A	5	ERS22973091	Persistent	33433_25
116	231765wF3_9149A	45	ERS22973088	NA	33433_26
117	231765wE6_9296A	45	ERS22973108	Persistent	33433_32
118	231765wA8_9357A	45	ERS22973118	Intermittent	33433_35
119	231765wB5_9212A	4245	ERS22973059	NA	33433_40
120	231765wA6_9272A	5	ERS22973105	Persistent	33433_41
121	231765wF7_9340A	39	ERS22973059	Persistent	33433_46
122	231765wE4_9194A	39	ERS22973094	Persistent	33433_51
123	231765wG5_9261A	34	ERS22973102	Persistent	33433_54
124	231765wG7_9341A	15	ERS22973119	Persistent	33433_58
125	231765wE5_9245A	398	ERS22973101	Persistent	33433_6
126	231765wB6_9273A	59	ERS22973107	Persistent	33433_7
127	231765wB7_9329A	NA	ERS22973109	Persistent	33433_81
128	231765wD4_9181A	45	ERS22973095	Persistent	33433_85
129	231765wG6_9309A	5	ERS22973110	Persistent	33433_9
130	231765wC7_9331A	188	ERS22973114	Persistent	33433_93
131	231764wC3_8506A	5	ERS22973061	Persistent	35228_56
132	231764wF4_8563A	398	ERS22972951	Persistent	35228_58
133	231764wD4_8555A	30	ERS22972952	Persistent	35228_87
134	231764wD3_8519A	789	ERS22973064	Intermittent	35228_92
135	231765wG4_9203A	2126	ERS22973098	Persistent	45485_15
136	231764wF11_8903A	30	ERS22972991	Persistent	45485_35
137	231765wE10_9521A	5	ERS22973149	Persistent	45485_50
138	231765wD8_9389A	45	ERS22973123	Persistent	45485_57
139	231764wD11_8890A	15	ERS22972989	Persistent	45485_59
140	231765wD5_9227A	8	ERS22973100	Persistent	45485_60
141	231765wC5_9222A	2896	ERS22973099	Persistent	45485_75
142	38088_2#72	34	ERS6226948	Persistent	45485_76
143	231765wC6_9291A	39	ERS22973106	NA	45485_77
144	231765wF5_9254A	398	ERS22973104	Intermittent	45485_88
145	231764wB9_8765A	15	ERS22972973	Intermittent	45711_1
146	231764wD8_8714A	30	ERS22972967	Persistent	45711_14
147	38088_2#73	12	ERS6226746	Persistent	45711_15
148	231765wG2_9014A	182	ERS22973075	Persistent	45711_20
149	231764wC11_8868A	39	ERS22972988	NA	45711_29
150	231764wF9_8797A	8	ERS22972977	Intermittent	45711_3
151	231765wE2_9065A	8	ERS22973081	Persistent	45711_34
152	231765wB3_9107A	121	ERS22973083	NA	45711_35
153	38088_2#70	630	ERS6226945	Intermittent	45711_41
154	231765wE1_9016A	6	ERS22973073	Persistent	45711_44
155	231764wA11_8864A	30	ERS22972986	Persistent	45711_5
156	231764wA9_8752A	5	ERS22972971	Persistent	45711_50
157	231764wD10_8818A	12	ERS22972981	Persistent	45711_51
158	38088_2#75	398	ERS6226750	NA	45711_52
159	231764wB12_8959A	5	ERS22972995	Intermittent	45711_54
160	231765wC1_8995A	45	ERS22973070	Persistent	45711_67
161	231765wF1_9022A	9	ERS22973074	Persistent	45711_68
162	231765wH2_9078A	7	ERS22973084	Persistent	45711_70
163	231765wC3_9110A	398	ERS22973085	Persistent	45711_71
164	231764wC12_8967A	39	ERS22973067	Persistent	45711_78
165	38214_1#206	NA	ERS6226754	Persistent	45711_79
166	231765wC2_9056A	30	ERS22973078	Persistent	45711_81
167	231765wD3_9111A	121	ERS22973086	Persistent	45711_83
168	231764wG9_8761A	8	ERS22972972	Persistent	45711_86
169	231764wH10_8863A	45	ERS22972985	Persistent	45711_88
170	231764wH11_8935A	25	ERS22972992	Persistent	45711_89
171	231765wH1_9028A	34	ERS22973076	Persistent	45711_9
172	231765wD1_9005A	398	ERS22973072	Persistent	45711_91
173	231765wD9_9447A	45	ERS22973129	Intermittent	45747_46
174	231765wH9_9482A	88	ERS22973136	Persistent	45747_47
175	231765wC10_9502A	398	ERS22973141	Persistent	45747_70
176	231765wB10_9499A	97	ERS22973138	Persistent	45747_83
177	38214_1#255	NA	ERS6226949	Intermittent	46538_14
178	38088_2#131	5	ERS6226777	Persistent	46538_15
179	38214_1#261	5	ERS6226964	Intermittent	46538_6
180	38088_2#139	15	ERS6226784	Persistent	46599_17
181	38088_2#135	59	ERS6226780	Intermittent	46665_76
182	38088_2#162	5	ERS6226983	Persistent	46665_9
